# Supplementary material
Source: PubMed Central journal article supplement (PMC1084277)
Supplement: molcellb_25_9_3401__1.pdf [file molcellb_25_9_3401__1.pdf]

## Appendix

1. *Assessing the significance of the observed differences in response between treatment and control samples, for each gene.*

In a single experiment, with observations  $x_1, x_2, \dots, x_k$  from the treatment group and  $y_1, y_2, \dots, y_l$  from the control group, a standard procedure for testing the significance of a difference in response is to compute a  $t$ -statistic (“Student”, 1908). Assuming a common variance for the  $x$ - and  $y$ -observations, the statistic can be expressed as

$$t = \sqrt{\frac{kl}{k+l}} \left\{ \frac{\bar{x} - \bar{y}}{\hat{\sigma}} \right\},$$

where

$$\bar{x} = k^{-1} \sum_{j=1}^k x_j, \quad \bar{y} = l^{-1} \sum_{j=1}^l y_j$$

and

$$\hat{\sigma}^2 = \frac{1}{k+l-2} \left\{ \sum_{j=1}^k (x_j - \bar{x})^2 + \sum_{j=1}^l (y_j - \bar{y})^2 \right\}.$$

The value of  $t$  is then compared to the  $t$ -distribution  $t_{k+l-2}$  with  $k+l-2$  degrees of freedom, and is considered ‘significant’ if unusually large in absolute value.

False positives can occur either because (by chance) the  $x$ -observations are on average rather larger (or smaller) than the  $y$ -observations, or because (by chance) both the  $x$ -observations and the  $y$ -observations are tightly grouped. Thus, in the extreme case in which all  $k$  of the  $x$ -values were equal and all  $l$  of the  $y$ -values were equal,  $\hat{\sigma}$  would take the value 0, and any difference between  $\bar{x}$  and  $\bar{y}$  would be judged to be significant, because then  $|t| = \infty$ . When screening large numbers of experiments for significant treatment effects by using  $\bar{x} - \bar{y}$  as a measure of the difference in response, false positives of the first variety are an unavoidable fact of life, but those of the second variety can be reduced when the individual experiments are all of experimentally similar nature, as is the case in microarray analyses.

Suppose, then, that the overall experiment consists of  $N$  similar sub-experiments, the  $i$ 'th of which yields observations  $x_{i1}, x_{i2}, \dots, x_{ik_i}$  and  $y_{i1}, y_{i2}, \dots, y_{il_i}$ . The idea is to suppose that there is some weak similarity between the random components of the observations in the different sub-experiments, inasmuch as the variances  $\sigma_1^2, \sigma_2^2, \dots, \sigma_N^2$  underlying the data obtained in the  $N$  sub-experiments are ‘comparable’; in the sense that they can be well described as a random sample from some probability distribution, taken

independently of the mean values. Note that this already implies that the data may need to be pre-transformed, if a relationship between mean and variance is apparent; we use an appropriately chosen power transformation to achieve this. Then information about the distribution of the variances, derived from all  $N$  sub-experiments, can be used in making the estimate of the variance appropriate to each individual sub-experiment, reducing the occurrence of false positives arising from inaccurately estimating the  $\sigma_i^2$ 's.

We therefore use a Bayesian analogue of the two sample  $t$ -test in each of the  $N$  sub-experiments, derived on the basis of the assumptions that:

- A1. The values of  $\mu_i$  (the sample weighted average of the mean of an observation),  $\delta_i$  (a measure of the treatment effect, equal to 0 if there is none) and  $\sigma_i^2$  are sampled independently,  $\mu_i$  and  $\delta_i$  from the flat, 'uninformative' improper prior density, and  $mv/\sigma_i^2$  from the chi-squared  $\chi_m^2$  distribution, where the model parameters  $m$  and  $v$  are to be estimated; the larger the value of  $m$ , the more concentrated is the distribution of  $\sigma_i^2$  around the value  $v$ .
- A2. Conditional on the values of  $\mu_i$ ,  $\delta_i$  and  $\sigma_i^2$ ,  $x_{i1}, x_{i2}, \dots, x_{ik_i}$  is a random sample of size  $k_i$  from the Normal distribution with mean  $\mu_i + \delta_i/k_i$  and variance  $\sigma_i^2$ , and  $y_{i1}, y_{i2}, \dots, y_{il_i}$  is an independent random sample of size  $l_i$  from the Normal distribution with mean  $\mu_i - \delta_i/l_i$  and variance  $\sigma_i^2$ ; we suppose that both  $k_i$  and  $l_i$  are at least 2.

Then, if the parameters  $m$  and  $v$  are known, the procedure is standard. The normal likelihood coupled with the choice of 'conjugate' prior distribution leads, after integrating out the parameters  $\mu_i$  and  $\sigma_i^2$ , to a  $t$ -distribution  $t_{\nu_i}$  for  $(\delta_i - \Delta_i)/C_i$ , where

$$\nu_i = k_i + l_i + m - 2, \quad \Delta_i = \left\{ \frac{k_i l_i}{k_i + l_i} \right\} (\bar{x}_i - \bar{y}_i)$$

and

$$C_i^2 = \frac{k_i l_i}{k_i + l_i} \frac{s_i^2}{\nu_i},$$

with

$$s_i^2 = s_{xi}^2 + s_{yi}^2 + mv$$

and

$$s_{xi}^2 = \sum_{j=1}^{k_i} (x_{ij} - \bar{x}_i)^2; \quad s_{yi}^2 = \sum_{j=1}^{l_i} (y_{ij} - \bar{y}_i)^2.$$

Hence  $\delta_i$  can be considered to be 'significantly' different from 0 if the value of  $|\Delta_i|/C_i$  is unusually large by comparison with the  $t_{\nu_i}$  distribution.

Note that, if  $m = 0$ , this procedure results in the usual two sample  $t$ -statistic. The information about the distribution of the variances  $\sigma_i^2$  derived from all  $N$  sub-experiments is seen to be formally equivalent to having  $m$  further observations, which contribute a total of  $mv$  to the residual sum of squares, thus in effect ‘shrinking’ the raw estimate of  $\sigma_i^2$  towards  $v$ ; the larger the value of  $m$ , the more pronounced the shrinkage. Note also that  $m$  need not be an integer.

To estimate suitable values of  $m$  and  $v$ , we use the observed values  $s_{xi}^2$  and  $s_{yi}^2$ ,  $1 \leq i \leq N$ . If  $mv/\sigma_i^2$  has the  $\chi_m^2$  distribution, and if  $k_i = k$  is constant in  $i$ , it follows that the  $s_{xi}^2$  are then a random sample from the distribution whose probability density function is

$$f(y) = c(m, k)(mv)^{m/2}y^{(k-3)/2}/(mv + y)^{(m+k-1)/2}$$

in  $y > 0$ , where the constant  $c(m, k)$  is such that  $f$  integrates to 1; and similarly for the  $s_{yi}^2$  values, if  $l_i = l$  is constant in  $i$ . Thus, in particular, if, as in many of our experiments,  $k = l = 3$ , it follows that the sums of squares are sampled from the distribution giving probability

$$F(a, b) = \int_a^b f(y) dy = \left\{1 + \frac{a}{mv}\right\}^{-m/2} - \left\{1 + \frac{b}{mv}\right\}^{-m/2}$$

to any interval  $[a, b]$ , for  $0 \leq a < b \leq \infty$ . This allows  $m$  and  $v$  to be estimated, for instance by choosing them to best fit the probabilities of  $s$  intervals  $(a_0, a_1), (a_1, a_2), \dots, (a_{s-1}, a_s)$ , where  $0 = a_0 < a_1 < \dots < a_s = \infty$  are appropriately chosen, to the relative frequencies with which the  $s_{xi}^2$  values actually belong to these intervals, by using a minimum chi-squared criterion. The model fit was typically found to be very good; Supplementary Figure 1 shows the superposition of the function  $F(t, \infty)$  and the cumulative curve  $S_x(t)$  defined by

$$S_x(t) = \frac{1}{N} \#\{i : s_{xi}^2 > t\}$$

for the *dmec48* treatment data.

In some of our experiments, other values of  $k$  and  $l$  were encountered. Theoretically, procedures such as maximum likelihood could be used to estimate  $m$  and  $v$ , though the log-likelihood functions are not particularly amenable. Instead, in order to maintain the simplicity of the above approach, which can be accomplished using a spread sheet, we preferred to use the fact that, if  $m + k > 3$ , then

$$\begin{aligned} & \int_{a_j}^{a_{j+1}} y^{-(k-3)/2} f(y) dy \\ &= c(m, k)(mv)^{-(k-3)/2} \left( \left\{1 + \frac{a_j}{mv}\right\}^{-(m+k-3)/2} - \left\{1 + \frac{a_{j+1}}{mv}\right\}^{-(m+k-3)/2} \right), \end{aligned}$$

or, equivalently,

$$\frac{\int_{a_j}^{a_{j+1}} y^{-(k-3)/2} f(y) dy}{\int_0^\infty y^{-(k-3)/2} f(y) dy} = \left\{1 + \frac{a_j}{mv}\right\}^{-(m+k-3)/2} - \left\{1 + \frac{a_{j+1}}{mv}\right\}^{-(m+k-3)/2}.$$

These theoretical values can then be fitted in similar fashion, by choice of  $m$  and  $v$ , to the  $s$  empirical weighted frequencies

$$\frac{\sum_{i:a_j \leq s_{xi}^2 < a_{j+1}} (s_{xi}^2)^{-(k-3)/2}}{\sum_{i=1}^N (s_{xi}^2)^{-(k-3)/2}}, \quad 0 \leq j \leq s-1.$$

In our application, we only needed this variant for  $k = l = 2$ .

The analysis leading to the Bayesian  $t$ -test was made on the assumption of having a common variance for the  $x$ - and  $y$ -values within each sub-experiment. We actually used the above estimation procedure separately for the  $s_{xi}^2$ 's and the  $s_{yi}^2$ 's, and found that whereas the  $m$ -values so obtained were reasonably similar, the values  $v_x$  and  $v_y$  were at times substantially different. We therefore modified our procedure to accomodate this, taking  $v$  to be the average of  $v_x$  and  $v_y$ , and using a Bayesian  $t$ -test for variances known to be in a given proportion: Assumption A1 remains as before, with  $m$  also taken to be the average of  $m_x$  and  $m_y$ , and A2 is replaced by the assumption

A2'. Conditional on the values of  $\mu_i$ ,  $\delta_i$  and  $\sigma_i^2$ ,  $x_{i1}, x_{i2}, \dots, x_{ik_i}$  is a random sample of size  $k_i$  from the Normal distribution with mean  $\mu_i + \alpha_x \delta_i / k_i$  and variance  $\alpha_x \sigma_i^2$ , and  $y_{i1}, y_{i2}, \dots, y_{il_i}$  is an independent random sample of size  $l_i$  from the Normal distribution with mean  $\mu_i - \alpha_y \delta_i / l_i$  and variance  $\alpha_y \sigma_i^2$ ;

we take  $\alpha_x = v_x/v$  and  $\alpha_y = v_y/v$ . This has the effect of changing some of the formulae defining the test statistic slightly: we now have

$$\Delta_i = \frac{k_i l_i}{\alpha_x l_i + \alpha_y k_i} (\bar{x}_i - \bar{y}_i), \quad C_i^2 = \frac{k_i l_i}{\alpha_x l_i + \alpha_y k_i} \frac{s_i^2}{\nu_i}$$

and

$$s_i^2 = \frac{s_{xi}^2}{\alpha_x} + \frac{s_{yi}^2}{\alpha_y} + mv;$$

the degrees of freedom  $\nu_i$  remain unchanged. The fits to the empirical  $s_{xi}^2$  and  $s_{yi}^2$  distributions obtained under these assumptions are illustrated by the superposition of  $S_x(\alpha_x t)$ ,  $S_y(\alpha_y t)$  and  $F(t, \infty)$  for the *dmyc48* treatment and control data in Supplementary Figure 2.

To check the assumption that the ratio  $\sigma_{xi}^2/\sigma_{yi}^2$  of the true variances has the same value  $\alpha_x/\alpha_y$  for each  $i$ , we computed the sample variance of  $z_i$ ,  $1 \leq i \leq N$ , where  $z_i =$

$\log_e s_{x_i}^2 - \log_e s_{y_i}^2$ . Under the assumption that the ratio is fixed, and if  $k = 3$ , the  $z_i$ 's are a random sample from a translate of the difference of two independent random variables with Gumbel distributions, and thus have underlying variance  $2\pi^2/8 \approx 2.5$ . We obtained values of around 3.5 for these sample variances, indicating that a model with variances  $\sigma_{x_i}^2$  and  $\sigma_{y_i}^2$  sampled *independently* as in Assumption A.1 might better fit the data. The consequences for our procedure would only be to replace each  $s_i^2/\nu_i$  by a value 'shrunk' somewhat closer to  $v$ , and would not materially affect our choices of interesting genes.

## 2. Estimating the conservation probability of a given 6-mer.

The model is as follows. For any given gene, there is a probability  $f$  that the 6-mer under consideration is essential to its functioning, in which case it will appear in the immediate upstream region in both species. With probability  $1 - f$ , its appearance is by chance; the conditional probability of it appearing in both species is then  $pp'$ , where  $p$  is the probability that the 6-mer appears by chance in a given species, and  $p'$  is the conditional probability that it then appears in the other species also. The value of  $p'$  could lie anywhere between  $p$  and 1, the smaller values corresponding to longer periods of evolutionary divergence between the two species. Thus the probability of the 6-mer appearing in both species is  $f + (1 - f)pp'$ , and in just one of them is  $(1 - f)2p(1 - p')$ .

The conservation probability  $p_c$  itself is here defined to be the probability that the 6-mer appears in the second species, given that it appears in the first: thus

$$p_c = \frac{f + (1 - f)pp'}{f + (1 - f)p}.$$

This can be rewritten as

$$\begin{aligned} p_c &= \frac{f + (1 - f)pp'}{f + (1 - f)pp' + (1 - f)p(1 - p')} \\ &= \frac{1}{1 + (1 - q)/2q} = \frac{2q}{1 + q}, \end{aligned}$$

where  $q$  is the probability that the 6-mer appears in both species, given that it appears in at least one of them. If  $b$  denotes the number of genes in which the 6-mer appears in both species, and  $T$  denotes the total number in which it appears in at least one species, then  $q$  is naturally estimated by  $b/T$ ; however, to protect against chance overestimates, we prefer to use the conservative estimate

$$\hat{q} = \frac{1}{T + 1} \left\{ b + 2 - 2\sqrt{1 + b(1 - b/T)} \right\},$$

which is about two standard deviations smaller if both  $b$  and  $T$  are moderately large, giving

$$\hat{p}_c = \frac{2 \left\{ b + 2 - 2\sqrt{1 + b(1 - b/T)} \right\}}{T + b + 3 - 2\sqrt{1 + b(1 - b/T)}}.$$

### 3. Tree-based classification.

We used a tree-based classification algorithm, CART [Breiman *et al.* (1984); Venables & Ripley (2002, pp. 251–266)], to detect 6-mers that appear more often immediately upstream of genes influenced by Myc than immediately upstream of genes uninfluenced by Myc. The presence or absence of each of the  $4^6 = 4'096$  possible 6-mers was used as covariate information, on the basis of which each gene was to be classified as influenced or uninfluenced by Myc. Algorithms such as CART are most effective if many classification rules can be constructed under slightly differing conditions, and the outcomes ‘averaged’ (Ripley 1996, pp. 65–66). Since the sets of genes influenced by Myc in the different experiments were relatively small (between 50 and 400) compared with those not influenced by Myc, we achieved this by comparing the set of influenced genes with randomly selected subsets of similar size drawn from the set of around 3'500 uninfluenced genes. The 6-mer CACGTG was consistently present as the most informative predictor for being influenced by Myc. There was evidence also for the 8-mers CACGTGtt, CACGTGcg, aaCACGTG and cgCACGTG being particularly interesting.

## References

- L. Breiman, J. H. Friedman, R. A. Olshen & C. J. Stone (1984). Classification and Regression Trees. Wadsworth and Brooks/Cole, Monterey CA. (Now Chapman & Hall/CRC Press).
- B. D. Ripley (1996) Pattern Recognition and Neural Networks. Cambridge University Press.
- “Student” (W.S. Gosset) (1908) The probable error of a mean. Biometrika 6, 1–25.
- W. N. Venables & B. D. Ripley (2002). Modern Applied Statistics with S, 4th Edition. Springer, New York.

## Supplementary Methods

### *Oligonucleotide sequences for in vitro synthesis of dsRNA*

Each primer contained a 5' T7 RNA polymerase binding site (TAATACGACTCACTATAGGGAGA) followed by the sequences specific for the targeted genes. The specific primer sequences were as follows: *dmyc* forward: 5'-CCGGCTCTGATAG-3', reverse: 5'-TGCTCATCATGGA-3'; *gfp* forward: 5'-TGAGCAAGGGCGAGG-3', reverse: 5'-GCGGCGGTCACGAAC-3'; *cyclinE* forward: 5'-ACGCTGTTCTGGTCTGGATT-3', reverse: 5'-AAGCTGAGCGAGGAAAATGA-3'; *dmnt*: forward: 5'-CAGCGGGCAGTCCATC-3', reverse: 5'-GCCGTGGGCGTGATTA-3'.

### *Oligonucleotides for chromatin immunoprecipitation*

Fragment "E" (+36 to +136); forward: 5' GGTCGTGCCGTACCGTATTC, reverse: 5' CGCTTAACTGGCTTCTTGCG. Fragment "U" (-1107 to -1022); forward: 5' CTCGAGCTCATTGTTCCG; reverse: 5' GAAAACCTACTCCGACTGGCC.

### *Oligonucleotides used for in vitro mutagenesis of the nnp1-promoter*

$\Delta E$ -box 5'-ACATCGAACGGCA**AGAATTCCGGT**CGTGCCGTAC-3';  $\Delta Flank$  5'-ATCGAACGGCC**CCACGTGATG**TCGTGCCG-3'; and  $\Delta E - 40$  5'-GTCATTTTCAGTA**ACACGTGCG**CATTTAGAGCTGTT-3'. The construct  $\Delta E$ -320 was made by the insertion of a DNA adaptor into  $\Delta E$ -box, the adaptor was formed by hybridisation of the following oligo-sequences: 5'-CTAGCA**ACACGTGCG**-3' and 5'-TCGAG**CGCACGTGTT**-3'. Sequences in bold contain (or replace, in the case of  $\Delta E$ -box) the decameric E-box sequence.

### *Construction of the CG5033 and CG4364 reporters*

Promoter sequences from -322 to +61 relative to the transcription start site of *CG5033* (E-box at +21, ATG at +56) and from -561 to +131 relative to the transcription start site of *CG4364* (E-box at -421, ATG at +133), respectively, were fused to the firefly luciferase ORF. In the  $\Delta E$ -box mutant, the sequence "CACGTG" was replaced by "GAATTC". The following oligonucleotides were used: *CG5033*-upstream: 5'-GTAGAGATCTGAATTT**CGCTG**AAAATGGTTCGTTG-3'; *CG5033*-downstream: 5'-ATGTT**CCAT**GGGGTCAATTTTGAGGTA-3'; *CG5033*- $\Delta E$ box: 5'-ATCGCTATCGCTGACTGCA**AGAATTCCGCCG**CGTTAGTTTTGTTTTTACC-3'; *CG4364*-upstream: 5'-CCCCAGATCTTCAAGAACACGACACAAG-3'; *CG4364*-downstream: 5'-CCAAC**CAT**GGTGCCGGTTTATGAAAATG-3'; the sequences printed in bold indicate the beginnings of the luciferase ORF and the mutated E-box, respectively.

### *Polytene chromosome staining*

Salivary glands of wandering 3<sup>rd</sup> instar larvae were dissected in PBS and fixed in 3.7 % formaldehyde solution for 3 min. Squashing was performed in a solution containing 3.7 % formaldehyde and 45 % acetic acid, according to Ashburner (1989). *Drosophila* – a laboratory manual (Cold Spring Harbor Laboratory Press). Slides were blocked in PBS containing 5 % BSA and 30 % FCS. Primary antibodies rat monoclonal anti-HA (Roche Applied Science), or mouse monoclonal anti RNA Polymerase II phosphorylated on CTD-Serine 2 (Covance MMS-129R, clone H5) were diluted 1:200 in blocking solution (5% BSA & 30% FCS in PBS) and incubated overnight at 4° C. Secondary antibodies Texas Red-conjugated anti- rat or FITC-conjugated anti mouse (Jackson ImmunoResearch Laboratories) were diluted 1:300 in blocking solution together with DAPI at 1 µg/ml for 2 h at room temperature. Fluorescence was visualized using a Zeiss Microscope.

### *Supplementary Legends*

**Supplementary Figures 1 and 2.** For description see mathematical appendix.

**Supplementary Figure 3:** Positions of E-boxes relative to transcription start sites in genes that are bound by dMyc in DamID assays (**bound**; Orian et al. 2003), up-regulated after dMyc over-expression *in vivo* in our experiments (**up**), and in different combinations of these two gene lists. The X-axis is labeled as in Fig. 3.

**Supplementary Figure 4.** Localization of dMyc and RNA Pol II(0) on larval polytene chromosomes. Chromosomes of control larvae (**A**) or larvae expressing HA-tagged dMyc in the fat body (**B**) were stained with antibodies against the HA-epitope (*green*), RNA PolII(0) (*red*) and with Hoechst 33258 to reveal DNA (*blue*). Arrows indicate some prominent sites of colocalization of dMyc and PolII(0) (*yellow*). Genotypes of the flies are: “*y w dpp-GAL4 / +*” (**A**) and “*y w; UAS-HA-dMyc / dpp-GAL4*”. Magnification: 40 x.

**Supplementary Figure 5.** Normalized luciferase activities of dMyc target reporter constructs. Plasmids expressing the firefly luciferase ORF under the control of the wild-type or E-box deleted *CG5033* promoter (**A**) or the *CG4364* promoter (**B**) were co-transfected with *gfp* or *dmyc* double-stranded RNAs as indicated. Firefly luciferase activities were normalized to the co-transfected *Renilla* luciferase activities expressed under the control of the constitutive *tubulin* promoter. The experiments were carried out in triplicate (as described in Materials & Methods) and the error bars indicate the standard deviations.

**Supplementary Figure 6.** Distribution of consensus E-boxes amongst vertebrate Myc targets. A collection of 1697 potential Myc targets was obtained from the “c-Myc cancer gene” web page (<http://www.myc-cancer-gene.org/>; 2). The subsequent analysis was restricted to the 145 genes shown to be **activated** by c-Myc in **human** cells and whose status as **direct** Myc targets was supported by at least one line of evidence (gel shift, foot print, chromatin immunoprecipitation, ability to be activated by a MycER fusion protein in the presence of cycloheximide). To analyse the promoters of these genes, the sequences of 1871 human promoters (from –499 to +100 relative to the transcription start site) were obtained from the curated “eukaryotic promoter database (EPD)” at the Swiss



Institute for Bioinformatics (ISB/SIB, <http://www.epd.isb-sib.ch/>; 1); this list contained 68 of the 145 Myc target genes described above. Twenty-two of these 68 genes (35%) contained at least one consensus E-box (17 genes with 1 E-box, 4 genes with 2 E-boxes, 1 gene with 3 E-boxes). For comparison, amongst 1526 human promoters from the EPD which have not (yet) been proposed to be Myc targets in any species, only 14% harbored a consensus E-box.

**Supplementary Table 1:** Number of genes with significantly altered expression in the different experimental situations. Gene lists are explained in Materials and Methods.

**Supplementary Table 2:** List of significant dMyc targets common to all three time points after *dmyc* RNAi. Columns labeled *6 h*, *12 h*, *48 h* show their expression ratios at the indicated time points, as determined by a comparison of *dmyc* RNAi microarrays with the corresponding *gfp* RNAi controls; all shown genes are down-regulated at all time points. *qRT-PCR*, expression ratios of selected genes as determined by quantitative real-time PCR of *dmyc* RNAi samples compared to *gfp* RNAi treated controls (averages and standard deviations of biologically independent triplicates). Column *E-box* shows position of E-boxes (where present) relative to transcription start site, in nucleotides. *Known* marks genes that have previously been identified as potential Myc targets in vertebrates (**V**) or *Drosophila* (**D**).

**Supplementary Table 3:** List of all genes that are significantly affected in any of the microarray experiments. *E-boxes*, positions of E-boxes relative to transcription start sites; **yellow** marks genes with an E-box between +1 and +100. *Affymetrix*, name of Affymetrix features corresponding to the indicated gene; wherever a single gene is represented by more than one Affymetrix feature, the 2<sup>nd</sup> and subsequent occurrences of the gene name are left blank. Column *R*, ratio of gene expression in the experiment versus control. Column *D* indicates direction of change – **U** is up-regulated, **D** is down-regulated, as compared to control. Column *S* indicates significant genes; **S**, differentially expressed with  $p < 0.001$ . Genes are marked in color in the experiments where they are significantly affected and their expression ratio is  $> 1.5$ -fold; **green** fields indicate down-regulation, **red** fields up-regulation, as compared to control.

### Supplementary References

1. **Schmid, C. D., V. Praz, M. Delorenzi, R. Perier, and P. Bucher.** 2004. The Eukaryotic Promoter Database EPD: the impact of in silico primer extension. *Nucleic Acids Res* **32 Database issue**:D82-5.
2. **Zeller, K. I., A. G. Jegga, B. J. Aronow, K. A. O'Donnell, and C. V. Dang.** 2003. An integrated database of genes responsive to the Myc oncogenic transcription factor: identification of direct genomic targets. *Genome Biol* **4**:R69.

# Supplementary Figure 1

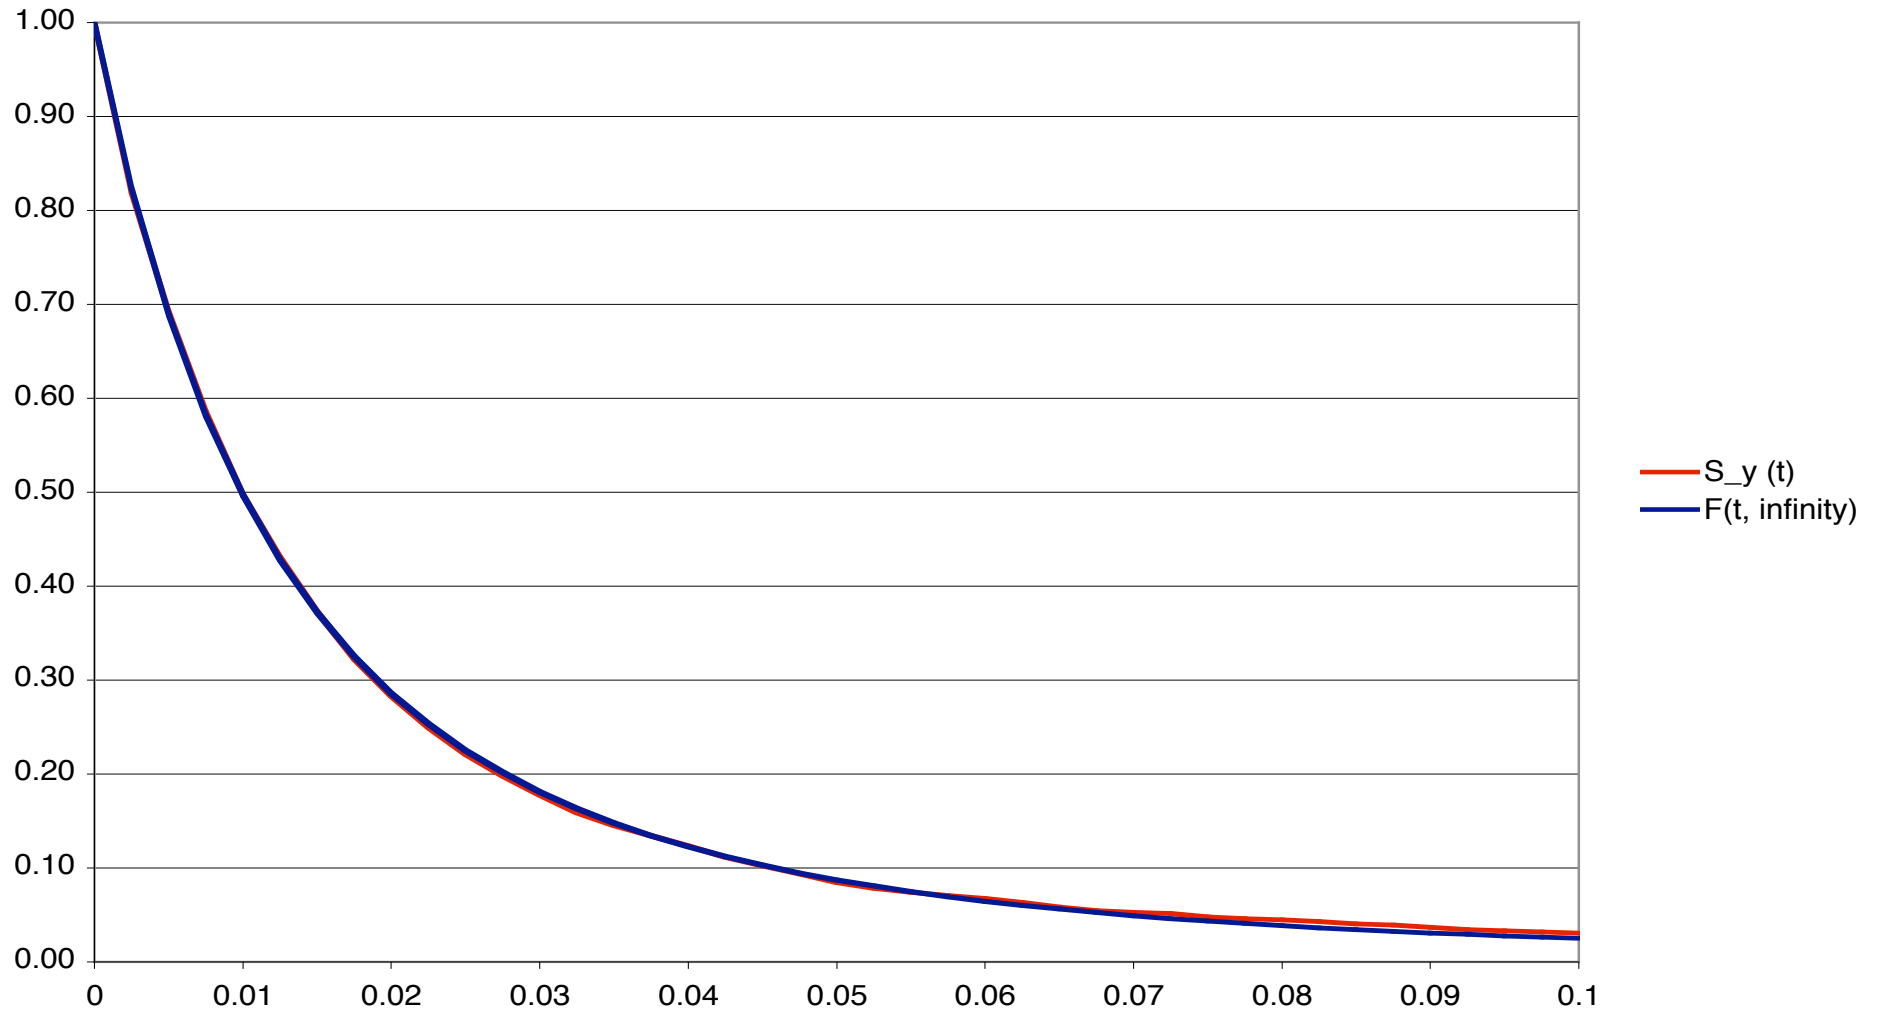

# Supplementary Figure 2

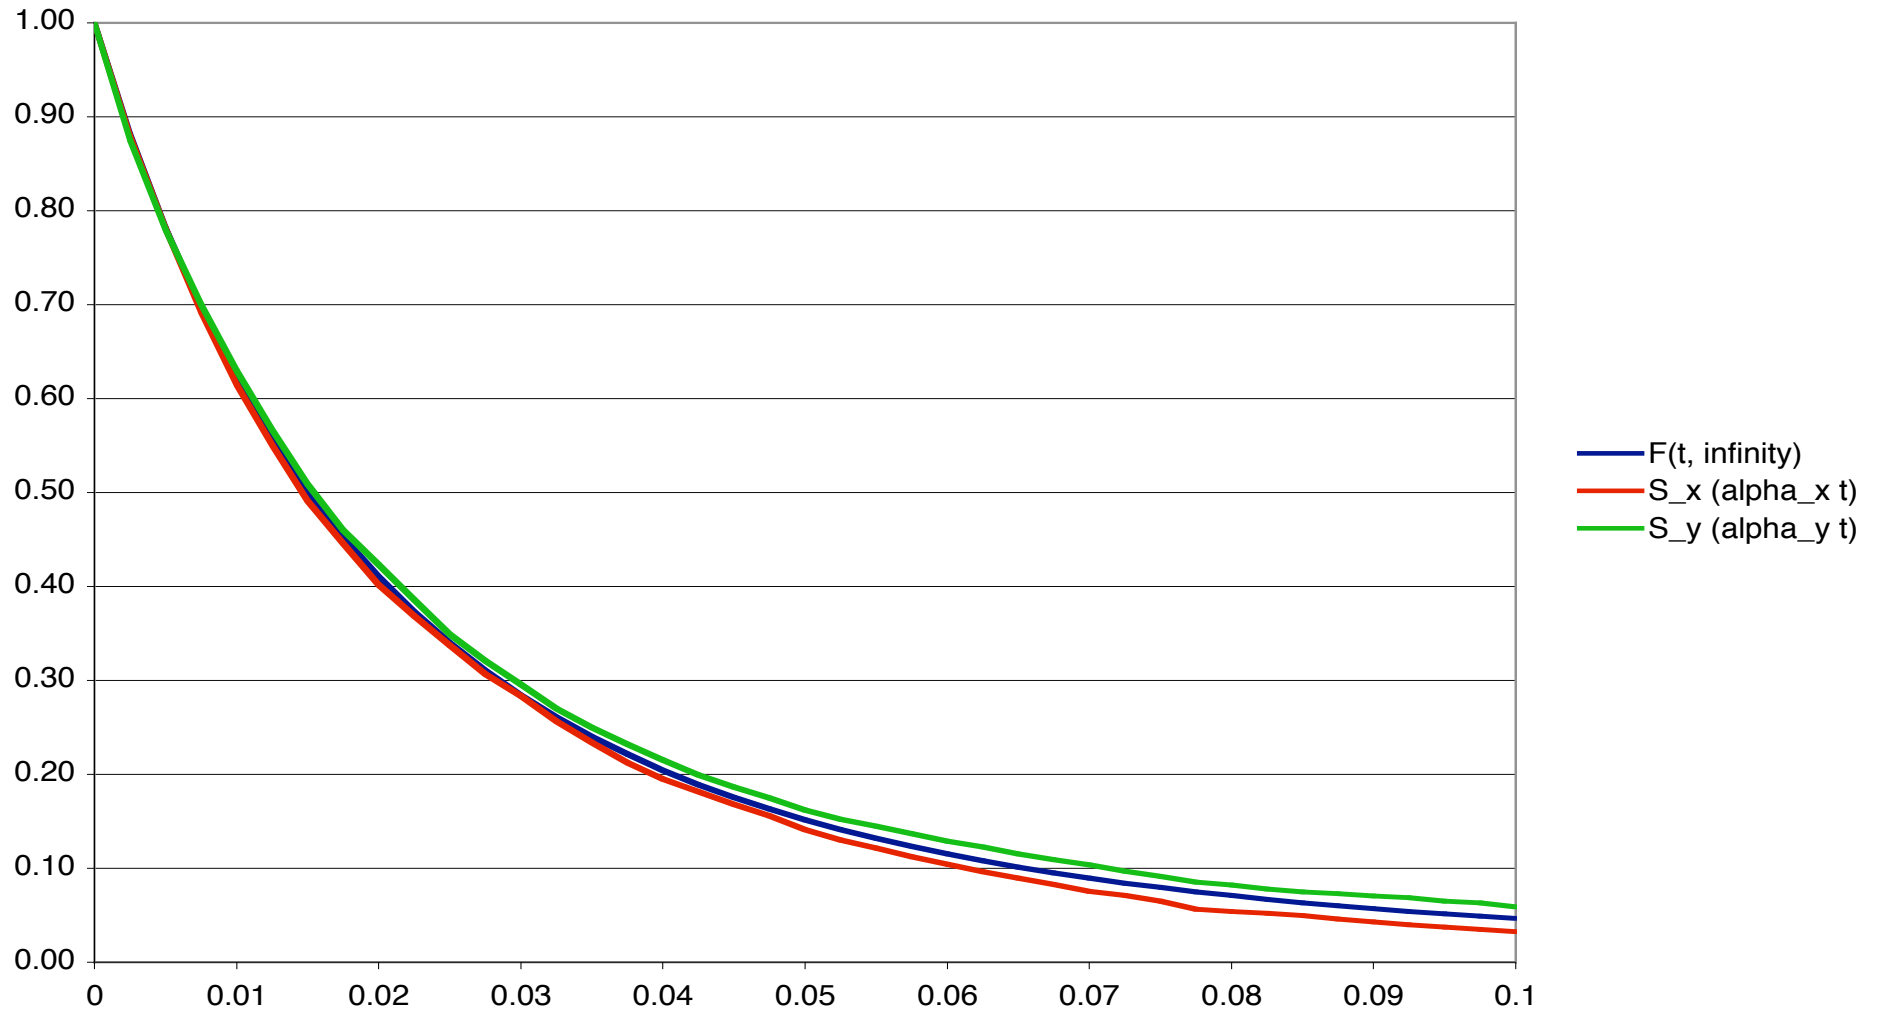

Supplementary Figure 3

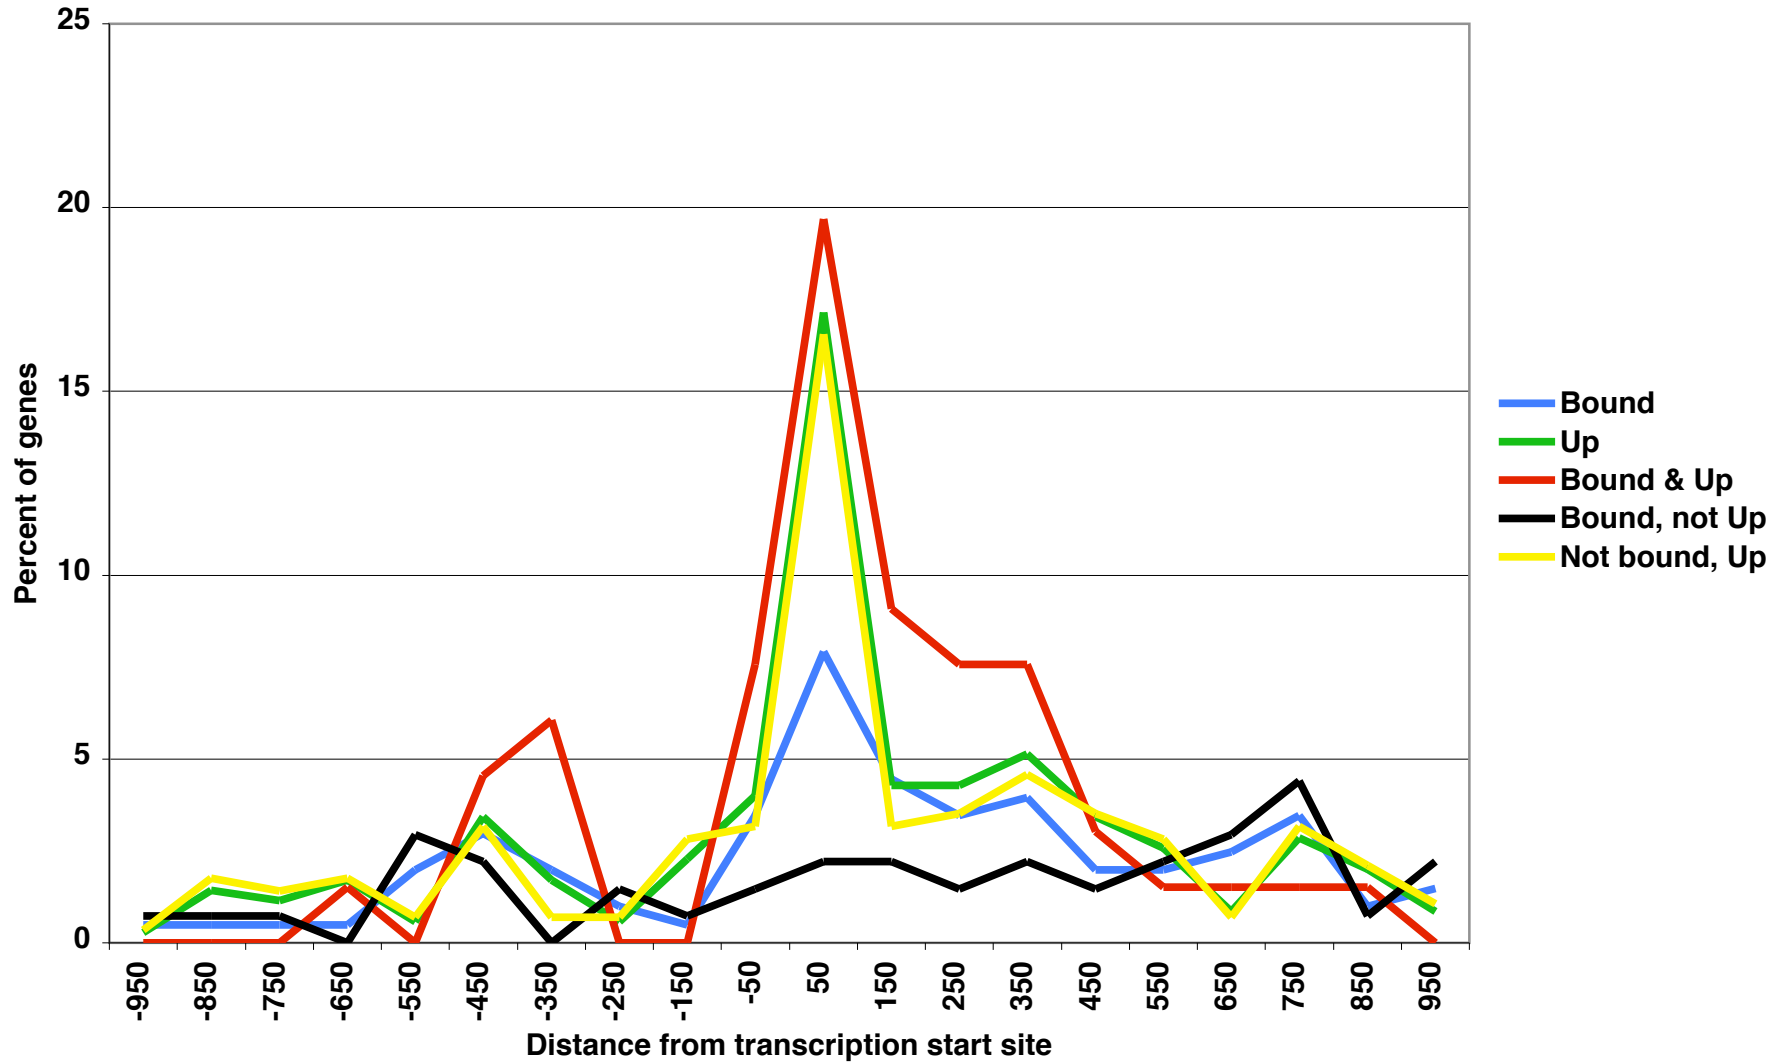

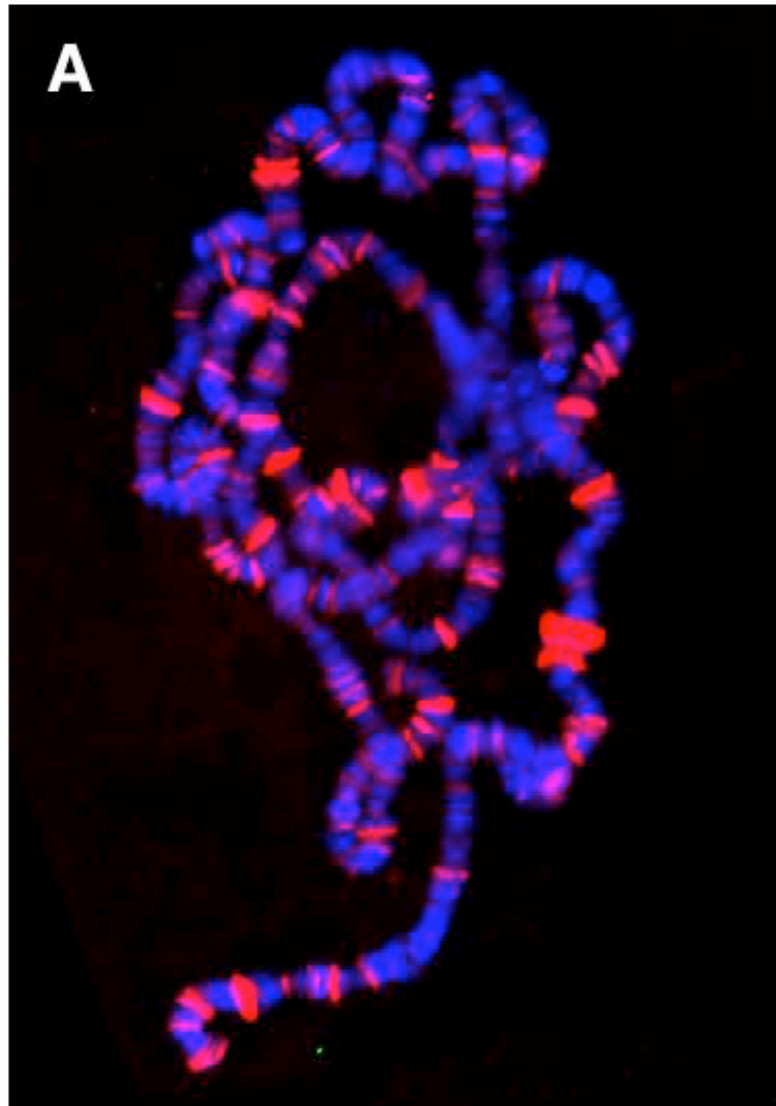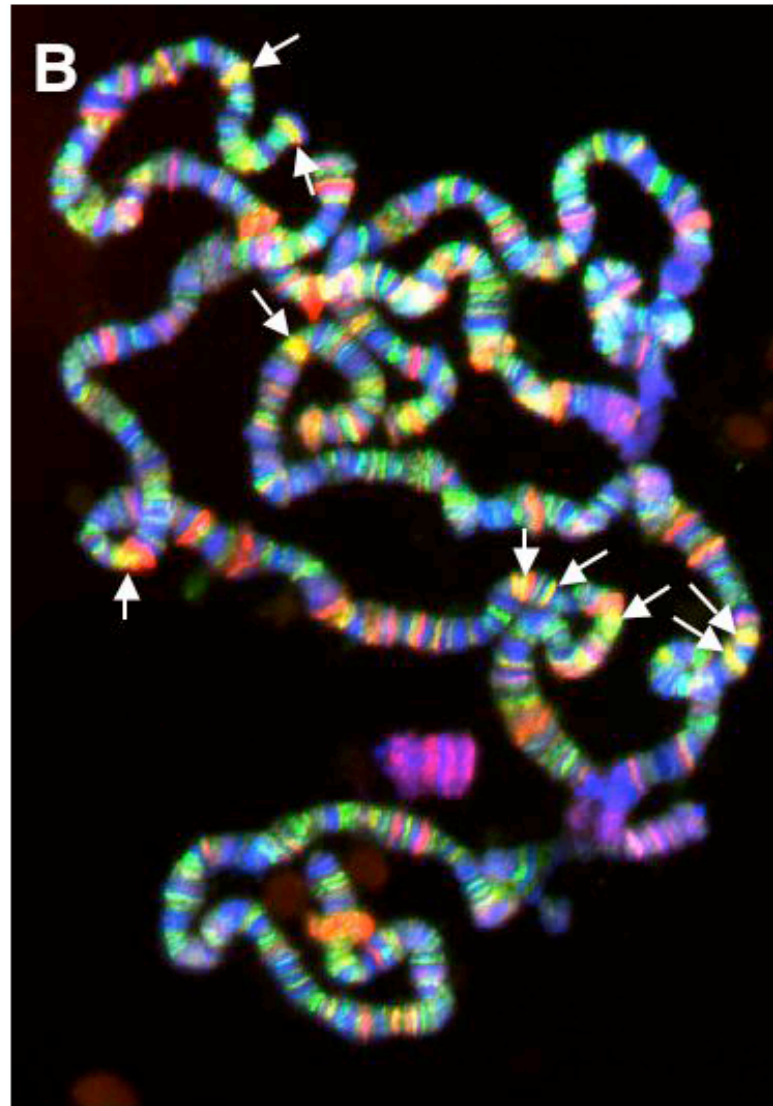

Supplementary Figure 4.

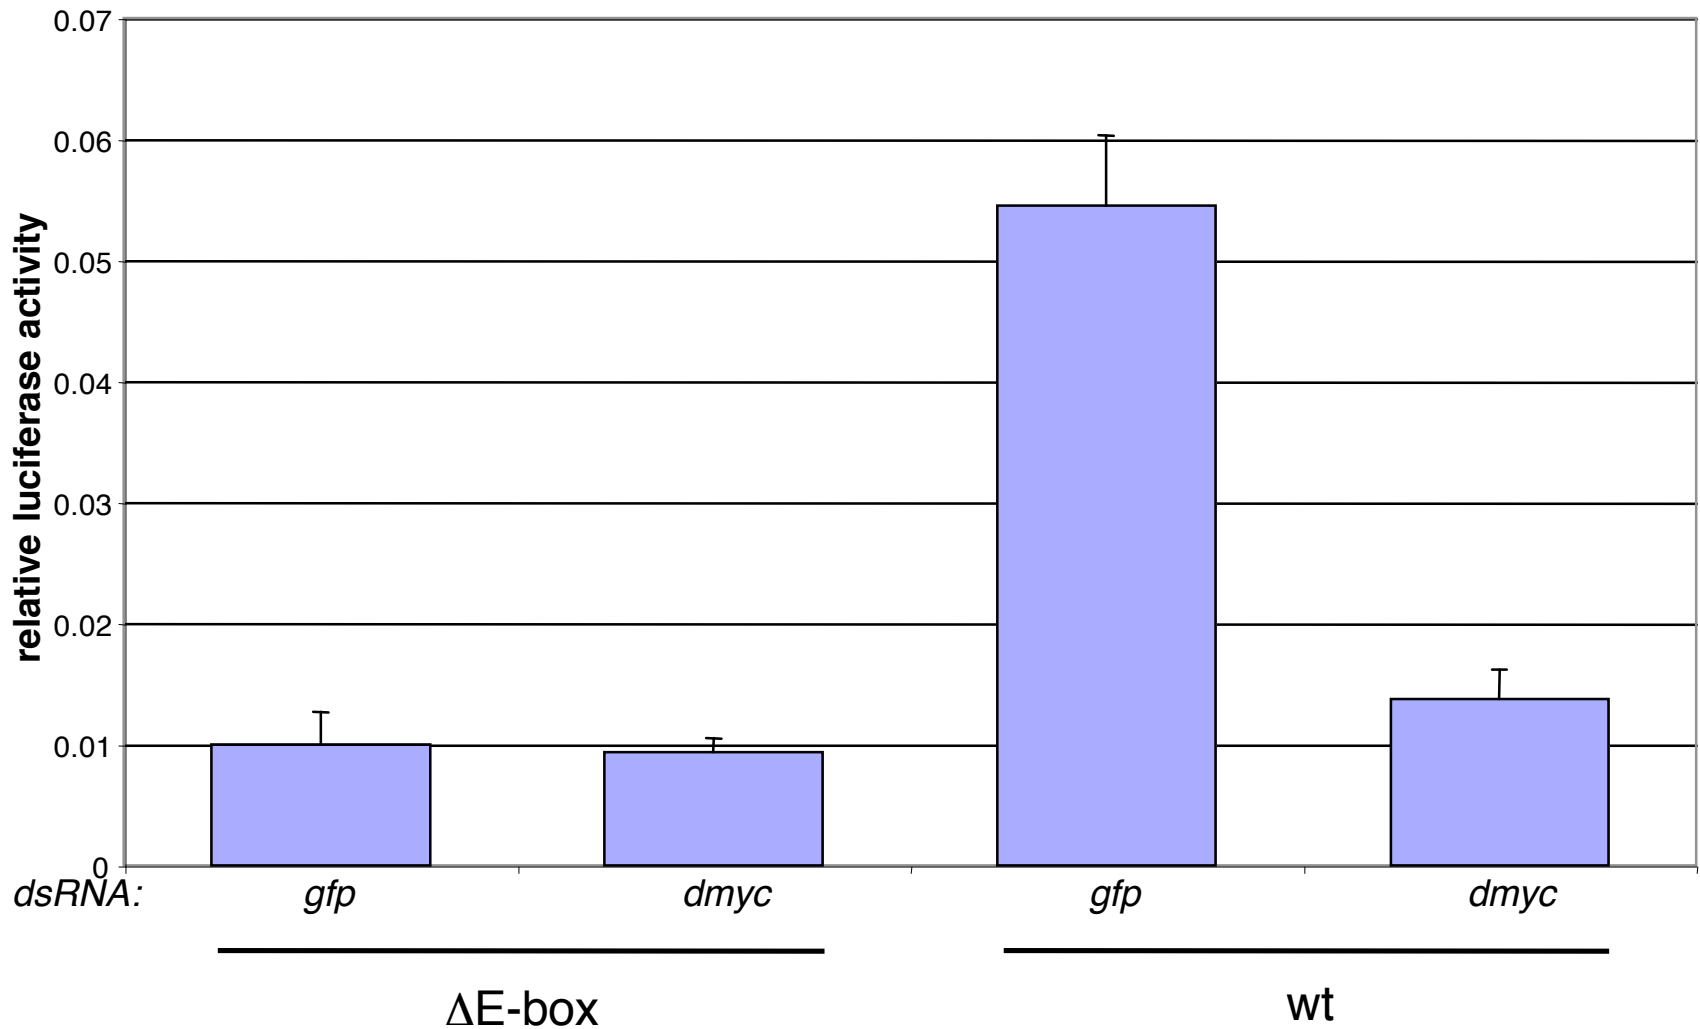

CG5033 -luciferase reporter

Supplementary Figure 5A

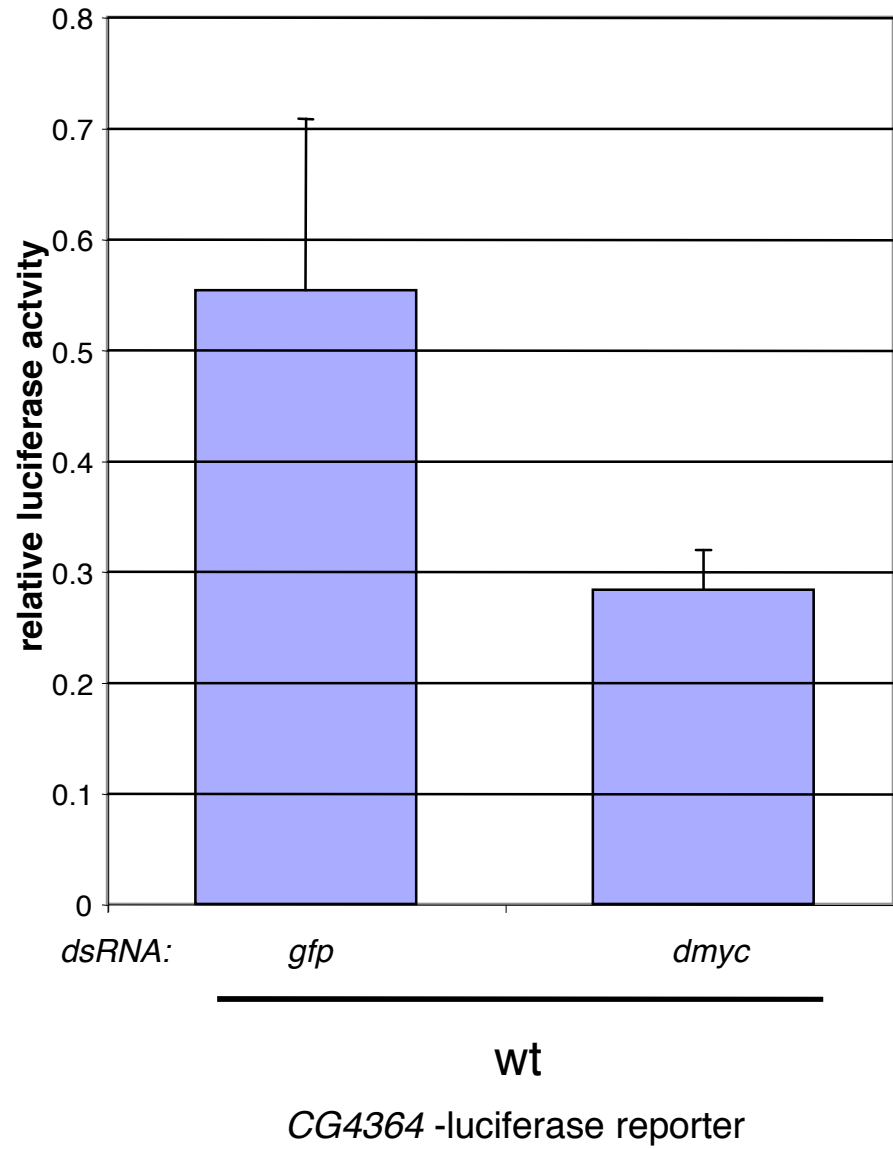

Supplementary Figure 5B

## Distribution of E-boxes in c-Myc target promoters

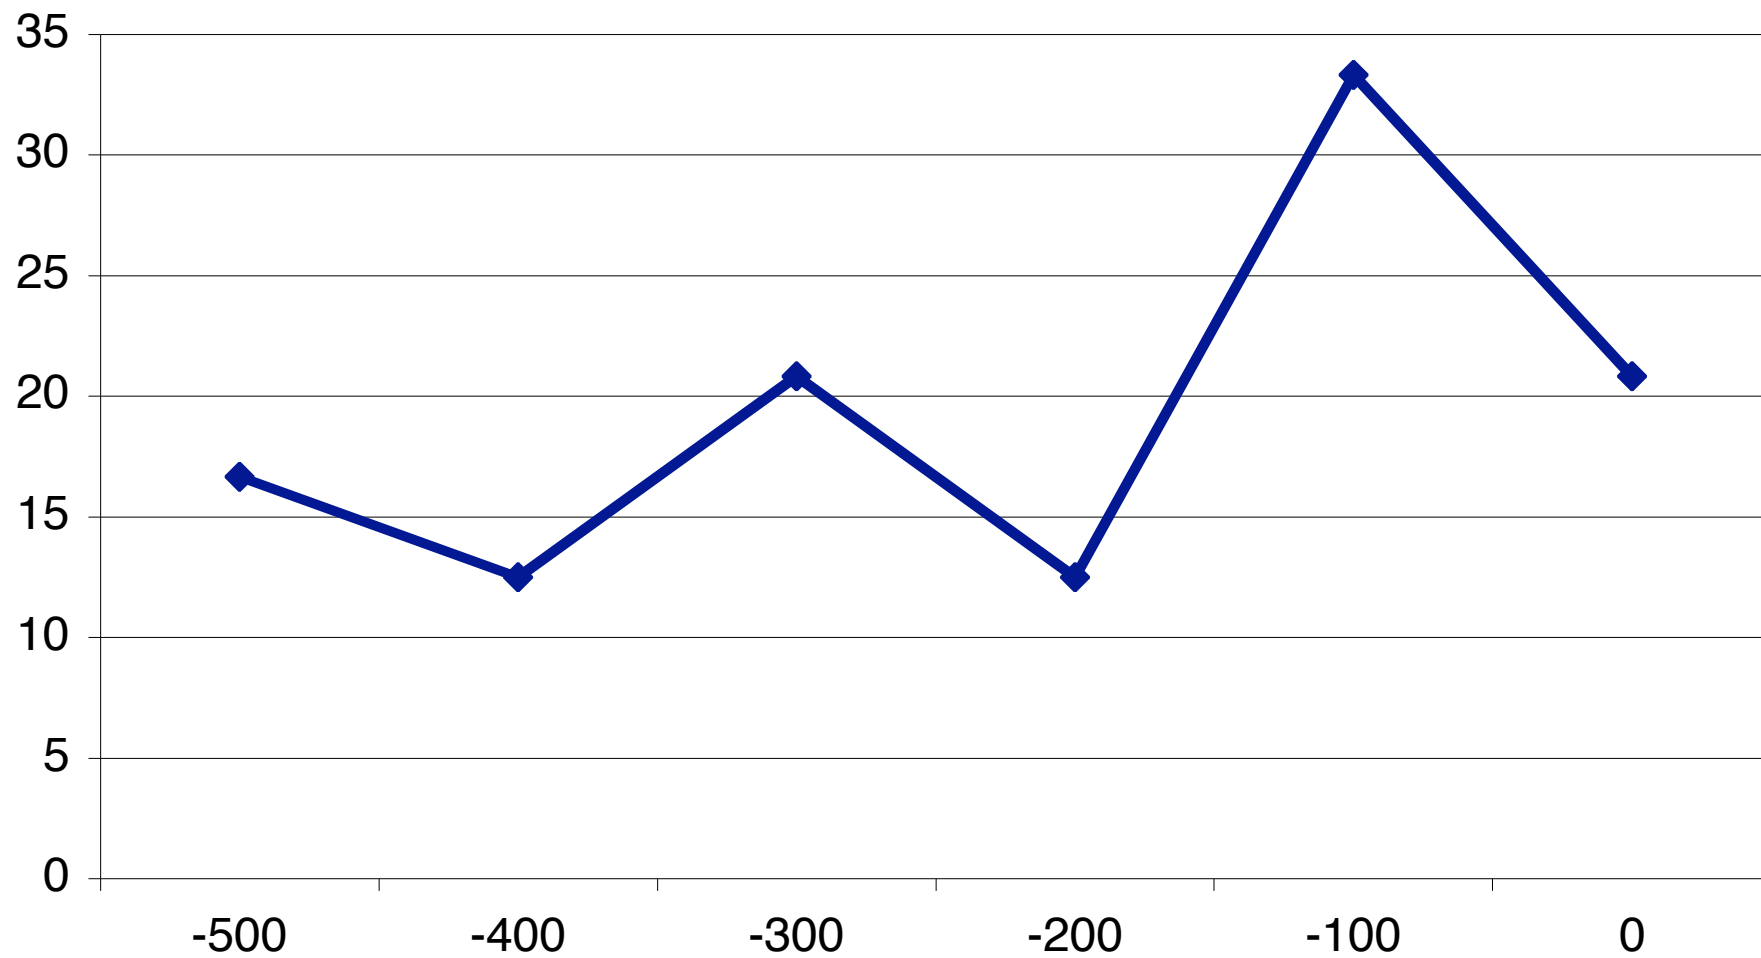

Supplementary Figure 6



|                 | <b>Down</b> | <b>Up</b> |
|-----------------|-------------|-----------|
| <b>dMyc6</b>    | 373         | 14        |
| <b>dMyc12</b>   | 246         | 7         |
| <b>dMyc48</b>   | 53          | 35        |
| <b>cyclin E</b> | 10          | 22        |
| <b>GOF</b>      | 104         | 165       |
| <b>LOF</b>      | 12          | 19        |

Supplementary Table 1

**Supplementary Table 2**

| Gene                                                   | 6 h | 12 h | 48 h | qRT-PCR   | E-box           | Notes                                 | Known |
|--------------------------------------------------------|-----|------|------|-----------|-----------------|---------------------------------------|-------|
| <b><i>Nucleolar function / ribosome biogenesis</i></b> |     |      |      |           |                 |                                       |       |
| nnp-1                                                  | 1.7 | 2.4  | 2.5  | 1.9 ± 0.2 | <b>29</b>       | rRNA processing                       |       |
| pit                                                    | 1.7 | 2.4  | 2.2  |           |                 | RNA helicase                          | D, V  |
| nop56                                                  | 1.6 | 2.5  | 2.5  | 2.1 ± 0.2 | <b>29</b>       | snRNP                                 | D, V  |
| fib                                                    | 1.8 | 3.5  | 2.8  | 2.4 ± 0.1 | <b>26, 834</b>  | 35S primary transcript processing     | D, V  |
| nopp140                                                | 2.3 | 2.5  | 1.9  |           | <b>48, 385</b>  | nucleologenesis                       | D, V  |
| CG6712                                                 | 2.6 | 3.7  | 2.8  | 1.6 ± 0.4 | <b>46</b>       | RNA binding                           | D, V  |
| CG8939                                                 | 1.8 | 2.7  | 2.0  |           | <b>15</b>       | rRNA processing                       |       |
| CG1542                                                 | 2.1 | 2.3  | 2.0  |           | <b>78</b>       | processing of 27S pre-rRNA            | D     |
| nop5                                                   | 1.7 | 2.7  | 2.6  | 2.5 ± 0.6 | -509, -9        | rRNA processing                       | D     |
| CG5728                                                 | 1.9 | 2.4  | 1.7  |           | <b>31, 789</b>  | rRNA processing                       | D     |
| CG4364                                                 | 1.8 | 2.3  | 2.2  |           | -421            | structural ribosome constituent       | D     |
| <b><i>Protein synthesis</i></b>                        |     |      |      |           |                 |                                       |       |
| NHP2                                                   | 2.1 | 2.5  | 2.3  |           | <b>41</b>       | NHP2 Ribosomal protein L7AE           |       |
| CG1381                                                 | 1.6 | 2.3  | 2.1  |           | <b>29</b>       | Ribosomal protein L10                 | D     |
| hoi-polloi                                             | 1.6 | 3.4  | 2.0  | 1.6 ± 0.4 | -15             | snRNP                                 |       |
| <b><i>RNA binding / mRNA processing</i></b>            |     |      |      |           |                 |                                       |       |
| CG4038                                                 | 1.8 | 2.6  | 2.3  |           | <b>36</b>       | snRNP                                 |       |
| rrp46                                                  | 2.2 | 2.1  | 2.2  |           |                 | mRNA processing                       | D     |
| <b><i>Other</i></b>                                    |     |      |      |           |                 |                                       |       |
| CG10341                                                | 1.5 | 2.3  | 1.7  |           | <b>17</b>       | defense response                      | D     |
| CG11660                                                | 2.3 | 2.1  | 2.0  |           | 224             | protein kinase activity               |       |
| CG6751                                                 | 1.7 | 2.2  | 2.0  |           | -641, <b>29</b> | TFIID complex                         |       |
| CG5033                                                 | 1.6 | 2.2  | 1.8  |           | <b>21</b>       | transcription factor activity         | D, V  |
| FK506-bp1                                              | 1.7 | 1.9  | 1.7  |           | -114, 216       | protein folding                       | D, V  |
| l(2)09851                                              | 1.7 | 2.3  | 1.7  |           | <b>35, 830</b>  | peroxisome targeting sequence binding |       |
| <b><i>Unknown</i></b>                                  |     |      |      |           |                 |                                       |       |
| CG7845                                                 | 2.9 | 3.5  | 2.0  |           | -697, <b>24</b> |                                       | D     |
| CG10805                                                | 2.1 | 2.7  | 2.0  |           | -13             |                                       | D     |
| CG9799                                                 | 1.8 | 2.1  | 1.8  |           | <b>6, 44</b>    |                                       |       |
| CG30349                                                | 1.8 | 2.7  | 2.1  |           | <b>90, 236</b>  |                                       |       |
| CG15019                                                | 2.0 | 2.0  | 1.7  |           | -85, 936        |                                       |       |
| CG1785                                                 | 1.9 | 2.4  | 2.1  |           | -454, <b>19</b> |                                       | D     |
| CG11604                                                | 2.4 | 3.7  | 2.7  |           | 416             |                                       | D     |
| CG1234                                                 | 2.0 | 3.0  | 2.2  |           |                 |                                       | D     |

Supplementary Table 3

| Gene                                                               | E-boxes |     |     |     | Affymetrix  | dmyc6 |   |   | dmyc12 |   |   | dmyc48 |   |   | cycE |   |   | GOF |   |   | LOF |   |   |
|--------------------------------------------------------------------|---------|-----|-----|-----|-------------|-------|---|---|--------|---|---|--------|---|---|------|---|---|-----|---|---|-----|---|---|
|                                                                    | 1st     | 2nd | 3rd | 4th |             | R     | D | S | R      | D | S | R      | D | S | R    | D | S | R   | D | S | R   | D | S |
| <b>Signaling / protein phosphorylation &amp; dephosphorylation</b> |         |     |     |     |             |       |   |   |        |   |   |        |   |   |      |   |   |     |   |   |     |   |   |
| Fps85D                                                             |         |     |     |     | 143164_at   | 1.3   | D |   | 1.0    | D |   | 1.3    | U |   | 1.1  | U |   | 2.1 | D | S | 1.1 | U |   |
| CG10522                                                            |         |     |     |     | 148666_at   | 1.4   | D |   | 1.2    | U |   | 1.0    | U |   | 1.1  | D |   | 2.1 | D | S | 1.2 | U |   |
| SAK                                                                |         |     |     |     | 144123_at   | 1.1   | D |   | 1.1    | U |   | 1.2    | U |   | 1.8  | D |   | 2.1 | D | S | 1.2 | U |   |
| CG17090                                                            |         |     |     |     | 142812_at   | 1.3   | U |   | 1.1    | U |   | 1.1    | D |   |      |   |   | 1.0 | D |   | 1.2 | U |   |
|                                                                    |         |     |     |     | 151694_at   | 1.0   | U |   | 1.1    | U |   | 1.0    | D |   | 1.4  | D |   | 1.2 | D |   | 1.6 | U | S |
| auxillin                                                           | -186    |     |     |     | 153829_at   | 2.0   | D | S | 1.4    | D | S | 1.1    | U |   | 1.5  | D |   | 1.0 | U |   | 1.4 | U |   |
| Pak                                                                | 639     | 810 |     |     | 153976_at   | 1.9   | D | S | 1.1    | D |   | 1.1    | U |   | 1.3  | D |   | 1.2 | U |   | 1.1 | U |   |
| put                                                                |         |     |     |     | 154591_at   | 1.8   | D | S | 1.2    | D |   | 1.2    | U |   | 1.0  | U |   | 1.6 | D |   | 1.1 | U |   |
| CaMKII                                                             |         |     |     |     | 142793_at   | 1.8   | D |   | 1.6    | D |   |        |   |   |      |   |   | 1.3 | U |   | 1.3 | U |   |
|                                                                    |         |     |     |     | 151686_s_at | 1.8   | D | S | 1.5    | D | S | 1.0    | D |   | 1.1  | D |   | 1.2 | U |   | 1.1 | U |   |
| CkII&bgr                                                           |         |     |     |     | 143092_at   | 1.7   | D | S | 1.4    | D | S | 1.2    | D |   | 1.1  | D |   | 1.0 | D |   | 1.1 | U |   |
| CG14217                                                            |         |     |     |     | 153995_at   | 1.7   | D | S | 1.2    | U |   | 1.1    | U |   | 1.1  | D |   | 1.1 | D |   | 1.1 | U |   |
| Plkk1                                                              |         |     |     |     | 143050_at   |       |   |   |        |   |   |        |   |   |      |   |   |     |   |   |     |   |   |
|                                                                    |         |     |     |     | 151762_s_at | 1.2   | U |   | 1.8    | D | S | 1.3    | D |   |      |   |   | 1.2 | D |   | 1.1 | U |   |
| Btk29A                                                             | 118     |     |     |     | 141857_at   | 1.0   | D |   | 1.0    | D |   | 1.0    | U |   | 1.0  | U |   |     |   |   | 1.1 | U |   |
|                                                                    |         |     |     |     | 142240_at   |       |   |   | 1.7    | D | S |        |   |   |      |   |   |     |   |   | 1.0 | U |   |
|                                                                    |         |     |     |     | 153920_at   | 2.4   | D | S | 1.1    | U |   | 1.1    | U |   | 1.5  | D |   | 1.3 | D |   | 1.1 | D |   |
| Caki                                                               |         |     |     |     | 143719_at   | 1.2   | U |   | 1.7    | D | S | 1.0    | D |   |      |   |   | 1.7 | U |   | 1.4 | U |   |
|                                                                    |         |     |     |     | 143857_at   | 1.1   | U |   | 1.1    | D |   | 1.0    | D |   | 1.2  | D |   | 1.3 | U |   | 1.4 | U |   |
|                                                                    |         |     |     |     | 150327_at   |       |   |   |        |   |   |        |   |   |      |   |   |     |   |   |     |   |   |
| CG7597                                                             |         |     |     |     | 141597_at   | 1.5   | D |   | 1.6    | D | S | 1.1    | D |   | 1.4  | D |   | 1.1 | D |   | 1.1 | D |   |
| Brd                                                                | -193    |     |     |     | 143088_at   |       |   |   |        |   |   |        |   |   |      |   |   | 2.5 | D | S | 1.1 | D |   |
| fng                                                                | -922    |     |     |     | 143664_at   | 1.1   | D |   | 1.4    | U |   | 2.2    | U | S | 1.3  | U |   | 1.8 | D | S | 1.0 | D |   |
| sno                                                                |         |     |     |     | 152069_at   | 1.7   | D | S | 1.5    | D |   | 1.1    | U |   | 1.2  | D |   | 1.4 | U |   | 1.2 | U |   |
| Cbl                                                                |         |     |     |     | 143910_at   | 1.1   | D |   | 1.2    | D |   | 1.0    | U |   | 1.4  | D |   | 2.5 | D | S | 1.1 | U |   |
|                                                                    |         |     |     |     | 148403_at   |       |   |   |        |   |   |        |   |   |      |   |   |     |   |   |     |   |   |
| spi                                                                |         |     |     |     | 143573_at   | 1.3   | U | S | 1.2    | U |   | 1.3    | U |   | 1.1  | D |   | 1.8 | D | S | 1.5 | U | S |
| msh                                                                |         |     |     |     | 151799_at   | 1.3   | D | S | 1.7    | D | S | 1.3    | D |   | 1.1  | D |   | 1.5 | U |   | 1.2 | D |   |
| Pi3K59F                                                            | 177     |     |     |     | 142299_at   |       |   |   |        |   |   |        |   |   |      |   |   |     |   |   |     |   |   |
|                                                                    |         |     |     |     | 151517_at   | 1.4   | D |   | 1.2    | D |   | 1.4    | U |   | 1.3  | U |   | 2.4 | D | S | 1.1 | U |   |
| Pi3K68D                                                            |         |     |     |     | 142750_at   | 1.1   | D |   | 1.1    | U |   | 1.1    | U |   | 1.3  | D |   | 2.2 | U | S | 1.2 | U |   |
|                                                                    |         |     |     |     | 151675_s_at | 1.4   | D |   | 1.2    | U |   | 1.2    | U |   | 1.3  | D |   | 1.0 | D |   | 1.2 | U |   |
| sno                                                                | 707     |     |     |     | 154678_at   | 2.0   | D | S | 1.2    | D |   | 1.0    | U |   | 1.0  | D |   | 1.2 | U |   | 1.2 | U |   |
| Socs36E                                                            |         |     |     |     | 146427_at   | 1.6   | U | S | 1.2    | D |   | 1.1    | D |   |      |   |   |     |   |   |     |   |   |
| Stam                                                               |         |     |     |     | 153478_at   | 1.6   | D | S | 1.1    | U |   | 1.3    | U |   | 1.2  | D |   |     |   |   | 1.1 | D |   |



|                                           |      |  |  |             |         |         |  |         |  |       |  |         |  |       |   |
|-------------------------------------------|------|--|--|-------------|---------|---------|--|---------|--|-------|--|---------|--|-------|---|
|                                           |      |  |  | 151756_at   | 1.6 D S | 1.2 D   |  | 1.2 U   |  | 1.0 D |  | 1.1 U   |  | 1.1 U |   |
| CG1846                                    |      |  |  | 142224_at   | 1.1 D   | 1.0 D   |  | 1.2 U   |  |       |  | 1.4 U   |  | 1.1 U |   |
|                                           |      |  |  | 151500_at   | 1.6 D S | 1.2 D   |  | 1.1 D   |  | 1.9 D |  | 1.1 U   |  | 1.1 U |   |
| Smg5                                      |      |  |  | 154083_at   | 1.6 D S | 1.1 D   |  | 1.1 D   |  | 1.1 U |  | 1.1 U   |  | 1.1 U |   |
| CG8707                                    |      |  |  | 152663_at   | 1.6 D S | 1.0 U   |  | 1.0 U   |  | 1.0 U |  | 1.2 U   |  | 1.2 D |   |
| CG31012                                   |      |  |  | 150911_at   |         |         |  |         |  |       |  |         |  |       |   |
|                                           |      |  |  | 151904_at   | 1.5 D S | 1.3 D   |  | 1.1 D   |  | 1.6 D |  | 1.1 D   |  | 1.1 D |   |
| CG18600                                   | 30   |  |  | 153805_at   | 1.8 D S | 2.5 D S |  | 1.8 D   |  | 1.3 D |  | 1.8 U   |  | 1.6 D |   |
| CG8461                                    | 3    |  |  | 142771_at   | 1.9 D   | 1.9 D S |  | 1.3 D   |  | 1.1 D |  | 1.5 U   |  | 1.1 D |   |
| spri                                      |      |  |  | 144808_at   | 1.1 U   | 1.9 D S |  | 1.0 U   |  |       |  |         |  | 1.2 D |   |
|                                           |      |  |  | 144809_at   | 1.1 D   | 1.2 D   |  | 1.2 D   |  | 1.2 D |  | 1.3 U   |  | 1.4 U |   |
|                                           |      |  |  | 144810_at   |         |         |  |         |  |       |  |         |  |       |   |
|                                           |      |  |  | 144812_at   |         |         |  |         |  |       |  |         |  |       |   |
|                                           |      |  |  | 151411_at   |         |         |  |         |  |       |  |         |  |       |   |
| CG31150                                   |      |  |  | 142109_at   |         |         |  |         |  |       |  |         |  | 1.1 D |   |
|                                           |      |  |  | 143021_at   | 1.2 U   | 1.8 D S |  | 1.2 U   |  |       |  |         |  |       |   |
|                                           |      |  |  | 149982_at   | 1.4 D   | 1.2 D   |  | 1.0 D   |  |       |  |         |  |       |   |
|                                           |      |  |  | 152020_at   | 1.0 U   | 1.1 U   |  | 1.5 U S |  | 1.0 U |  |         |  |       |   |
| CG7515                                    |      |  |  | 148349_at   |         |         |  |         |  |       |  |         |  |       |   |
|                                           |      |  |  | 148350_at   |         |         |  |         |  |       |  |         |  | 1.5 U |   |
|                                           |      |  |  | 148351_at   |         | 1.7 D S |  |         |  |       |  |         |  | 1.3 U |   |
|                                           |      |  |  | 153125_at   | 1.1 D   | 1.0 D   |  |         |  | 1.0 U |  |         |  | 1.2 U |   |
| CG16807                                   |      |  |  | 148891_at   |         | 1.7 D S |  | 1.3 D   |  |       |  | 1.7 D   |  | 1.2 U |   |
| CG8981                                    | 168  |  |  | 142887_at   | 1.2 D   | 1.2 U   |  | 1.0 U   |  |       |  | 1.3 D   |  | 1.1 U |   |
|                                           |      |  |  | 147046_at   |         | 1.4 D   |  |         |  |       |  |         |  | 1.0 D |   |
|                                           |      |  |  | 151710_at   | 1.6 D   | 1.6 D S |  | 1.1 D   |  |       |  | 2.0 D   |  | 1.1 U |   |
| CG11660                                   | 224  |  |  | 142720_at   | 2.3 D S | 2.1 D S |  | 2.0 D S |  | 1.5 D |  | 2.2 U   |  | 1.5 D |   |
| CG8801                                    |      |  |  | 141995_at   |         |         |  |         |  |       |  |         |  |       |   |
|                                           |      |  |  | 142696_at   | 1.0 D   | 1.5 D S |  | 2.0 D S |  | 1.4 U |  | 1.2 U   |  | 1.3 D | S |
| CG17272                                   |      |  |  | 150278_at   | 1.1 D   | 1.2 U   |  | 1.1 U   |  | 1.3 D |  | 2.6 U S |  | 1.1 D |   |
| CG11859                                   | -58  |  |  | 150571_at   | 2.9 D S | 2.0 D S |  | 1.3 D   |  | 1.1 U |  | 2.5 U S |  | 1.3 D |   |
| Ptpmeg                                    | 113  |  |  | 153778_at   | 1.1 D   | 1.1 D   |  | 1.3 D   |  | 1.2 D |  | 2.0 U S |  | 1.2 U |   |
| CG2199                                    | -868 |  |  | 154599_at   | 1.8 D S | 1.6 D S |  | 1.4 D   |  | 1.3 D |  | 1.8 U S |  | 1.2 D |   |
| RhoGDI                                    |      |  |  | 153882_at   | 1.3 D   | 1.1 D   |  | 1.0 U   |  | 1.3 D |  | 1.8 U S |  | 1.0 U |   |
| <b>Transcription factors / co-factors</b> |      |  |  |             |         |         |  |         |  |       |  |         |  |       |   |
| H                                         |      |  |  | 142797_at   | 1.5 D S | 1.1 D   |  | 1.1 U   |  | 1.1 U |  | 1.1 U   |  | 1.0 U |   |
|                                           |      |  |  | 151688_s_at | 2.0 D S | 1.1 D   |  | 1.1 D   |  | 1.4 D |  | 1.1 D   |  | 1.3 U |   |
| m4                                        | -570 |  |  | 143251_at   |         |         |  |         |  |       |  | 1.9 U S |  | 1.4 U |   |

|        |      |  |  |             |         |         |       |       |  |  |  |  |  |  |  |  |  |  |         |         |
|--------|------|--|--|-------------|---------|---------|-------|-------|--|--|--|--|--|--|--|--|--|--|---------|---------|
| HLHm3  | 585  |  |  | 143248_at   |         |         |       |       |  |  |  |  |  |  |  |  |  |  | 1.8 U S | 1.2 U   |
| Trl    |      |  |  | 142876_at   | 1.5 D S | 1.5 D S | 1.0 D | 1.8 D |  |  |  |  |  |  |  |  |  |  | 1.6 D   | 1.4 U   |
|        |      |  |  | 148766_at   |         |         |       |       |  |  |  |  |  |  |  |  |  |  |         |         |
|        |      |  |  | 151706_s_at | 1.1 D   | 1.0 D   | 1.1 U | 1.7 D |  |  |  |  |  |  |  |  |  |  | 1.7 D S | 1.3 U   |
| Scm    |      |  |  | 143335_at   | 1.9 D S | 1.1 D   | 1.0 D | 1.5 D |  |  |  |  |  |  |  |  |  |  | 1.3 D   | 1.0 U   |
| trx    |      |  |  | 143384_at   | 1.1 D   | 1.0 D   | 1.0 D | 1.2 D |  |  |  |  |  |  |  |  |  |  | 3.4 D S | 1.3 U   |
| Arc70  |      |  |  | 150989_at   | 1.3 D   | 1.0 D   | 1.0 U | 1.4 D |  |  |  |  |  |  |  |  |  |  | 1.3 U   | 1.2 U   |
|        |      |  |  | 153799_at   | 2.0 D S | 1.3 D   | 1.3 U | 1.1 U |  |  |  |  |  |  |  |  |  |  | 1.1 U   | 1.0 U   |
| tou    |      |  |  | 152868_at   | 1.1 D   | 1.3 D   | 1.0 U | 1.6 D |  |  |  |  |  |  |  |  |  |  | 1.8 D S | 1.1 U   |
| dom    | -499 |  |  | 142280_at   | 1.3 D   | 2.0 D S | 1.4 D | 1.2 D |  |  |  |  |  |  |  |  |  |  | 1.1 U   | 1.0 U   |
|        |      |  |  | 151511_r_at | 2.4 D S | 1.3 D   | 1.4 D | 1.2 D |  |  |  |  |  |  |  |  |  |  | 1.5 U   | 1.3 U   |
| Sin3A  | 906  |  |  | 141716_at   | 2.2 D S | 1.2 D   | 1.3 U | 1.4 D |  |  |  |  |  |  |  |  |  |  | 1.3 D   | 1.2 U   |
| Mio    |      |  |  | 154826_at   | 1.6 D S | 1.4 D   | 1.0 U | 1.0 U |  |  |  |  |  |  |  |  |  |  | 1.2 U   | 1.1 U   |
| ftz-f1 |      |  |  | 151259_at   |         |         |       |       |  |  |  |  |  |  |  |  |  |  |         |         |
|        |      |  |  | 154699_at   | 1.9 D S | 1.2 D   | 1.2 U | 1.5 D |  |  |  |  |  |  |  |  |  |  |         | 1.5 U   |
| Hr39   |      |  |  | 155094_at   | 1.9 D S | 1.1 D   | 1.3 U | 1.0 D |  |  |  |  |  |  |  |  |  |  | 1.1 D   | 1.1 U   |
| NFAT   | -391 |  |  | 153719_at   | 1.0 U   | 1.9 D S | 1.0 U | 1.3 D |  |  |  |  |  |  |  |  |  |  | 1.2 U   | 1.3 U   |
| mbl    |      |  |  | 143809_at   |         |         |       |       |  |  |  |  |  |  |  |  |  |  | 2.8 D S | 1.6 U   |
|        |      |  |  | 147360_at   |         |         |       |       |  |  |  |  |  |  |  |  |  |  |         |         |
| sina   |      |  |  | 153438_at   | 1.8 D   | 1.1 D   | 1.2 U | 1.0 D |  |  |  |  |  |  |  |  |  |  | 2.4 D S | 1.0 U   |
| sd     |      |  |  | 143337_at   | 1.2 D   | 1.5 D S | 1.2 D |       |  |  |  |  |  |  |  |  |  |  | 1.4 D   | 1.2 U   |
| Adf1   |      |  |  | 153659_at   | 1.7 D S | 1.1 U   | 1.1 U | 1.2 D |  |  |  |  |  |  |  |  |  |  | 1.8 U   | 1.1 U   |
| shn    |      |  |  | 152896_at   | 1.3 D   | 1.1 U   | 1.3 U | 1.1 D |  |  |  |  |  |  |  |  |  |  | 3.4 D S | 1.3 U   |
| Mad    |      |  |  | 143670_at   | 2.0 D S | 1.2 D   | 1.4 U | 1.3 U |  |  |  |  |  |  |  |  |  |  | 1.4 D   | 1.2 U   |
| srp    |      |  |  | 141687_at   | 1.7 D S | 1.1 D   | 1.3 U | 1.3 D |  |  |  |  |  |  |  |  |  |  |         |         |
| exd    |      |  |  | 153499_at   | 2.3 D S | 1.1 U   | 1.5 U | 1.5 D |  |  |  |  |  |  |  |  |  |  | 1.3 D   | 1.1 U   |
| kn     |      |  |  | 143207_at   |         |         |       |       |  |  |  |  |  |  |  |  |  |  | 2.7 D S | 1.1 U   |
| ttk    |      |  |  | 153259_s_at | 1.7 D   | 1.1 D   | 1.1 U | 1.0 U |  |  |  |  |  |  |  |  |  |  | 1.0 U   | 1.6 U   |
|        |      |  |  | 154445_at   | 2.9 D S | 1.1 U   |       |       |  |  |  |  |  |  |  |  |  |  | 1.0 D   | 1.2 U   |
| CrebA  |      |  |  | 143003_at   | 1.1 U   | 1.1 D   | 1.1 D | 1.4 D |  |  |  |  |  |  |  |  |  |  | 1.1 D   | 1.6 U S |
|        |      |  |  | 151748_at   | 1.7 D S | 1.2 D   | 1.1 U | 1.5 D |  |  |  |  |  |  |  |  |  |  | 1.3 D   | 1.8 U   |
| dm     |      |  |  | 143126_at   | 2.6 D S |         |       | 1.2 D |  |  |  |  |  |  |  |  |  |  | 1.3 D   |         |
| emc    |      |  |  | 153703_at   | 1.5 D S | 1.2 D   | 1.3 U | 1.7 D |  |  |  |  |  |  |  |  |  |  | 1.1 D   | 1.0 U   |
| corto  | 179  |  |  | 152846_at   |         |         |       |       |  |  |  |  |  |  |  |  |  |  | 2.4 D S | 1.3 U   |
| psq    |      |  |  | 154654_at   | 1.4 D   | 1.1 D   | 1.4 U | 1.1 U |  |  |  |  |  |  |  |  |  |  | 2.4 D S | 1.2 U   |
| Ada2S  |      |  |  | 154266_at   | 1.3 D   | 1.1 D   | 1.2 U | 1.0 U |  |  |  |  |  |  |  |  |  |  | 2.0 D S | 1.1 U   |
| crol   |      |  |  | 143920_at   | 1.3 U   | 1.5 D S | 1.2 D |       |  |  |  |  |  |  |  |  |  |  | 2.0 D S | 1.2 U   |
| XNP    |      |  |  | 143015_at   | 1.2 U   | 1.1 U   | 1.1 U | 1.5 D |  |  |  |  |  |  |  |  |  |  | 1.8 D S | 1.0 U   |

|                                                                                      |      |  |             |         |         |         |       |         |         |         |  |
|--------------------------------------------------------------------------------------|------|--|-------------|---------|---------|---------|-------|---------|---------|---------|--|
| CG9305                                                                               |      |  | 142244_at   | 2.1 D S |         |         | 1.3 D | 1.1 U   | 1.1 U   | 1.1 D   |  |
| CG7839                                                                               | 12   |  | 141506_at   | 2.1 D S |         |         |       | 1.0 U   | 1.7 U   | 1.1 D   |  |
| osa                                                                                  |      |  | 153971_at   | 2.0 D S | 1.2 U   |         | 1.2 U | 1.2 D   | 1.2 D   | 1.1 D   |  |
| Hcf                                                                                  |      |  | 141291_at   | 1.8 D S | 1.2 D   |         | 1.1 U | 1.6 D   | 1.3 D   | 1.1 U   |  |
| lolal                                                                                |      |  | 153811_at   | 1.8 D S | 1.1 D   |         | 1.1 U | 1.2 D   | 1.3 U   | 1.3 D   |  |
| NK7.1                                                                                |      |  | 142439_at   | 1.7 D S | 1.1 U   |         | 1.5 U | 1.2 U   |         |         |  |
|                                                                                      |      |  | 151571_at   |         |         |         |       | 1.1 U   |         | 1.1 U   |  |
| crp                                                                                  | 483  |  | 143223_at   | 1.7 D S | 1.4 D   |         | 1.3 U | 1.1 D   | 1.2 D   | 1.4 U   |  |
| CG3847                                                                               |      |  | 153252_at   | 1.7 D S | 1.1 D   |         | 1.0 D | 1.0 D   | 1.3 U   | 1.4 D   |  |
| CG3995                                                                               |      |  | 155052_at   | 1.7 D S | 1.3 D   |         | 1.1 U | 1.1 U   | 1.6 U   | 1.1 U   |  |
| CG2608                                                                               | -488 |  | 153949_at   | 1.7 D S | 1.2 D   |         | 1.1 U | 1.0 U   | 1.3 U   | 1.0 U   |  |
| CG9200                                                                               |      |  | 154028_at   | 1.7 D S | 1.3 D   |         | 1.2 U | 1.2 D   | 1.2 U   | 1.1 U   |  |
| su(Hw)                                                                               | 541  |  | 153859_at   | 1.7 D S | 1.0 U   |         | 1.1 U | 1.1 D   | 1.8 D   | 1.1 U   |  |
| MRG15                                                                                |      |  | 154132_at   | 1.6 D S | 1.2 D   |         | 1.3 U | 1.3 D   | 1.1 D   | 1.1 U   |  |
| kis                                                                                  | -299 |  | 141644_at   | 1.6 D S | 1.1 D   |         | 1.1 U | 1.3 D   | 1.2 D   | 1.2 U   |  |
|                                                                                      |      |  | 145517_at   | 1.2 D   | 1.0 U   |         |       |         | 1.5 D   | 2.1 U S |  |
|                                                                                      |      |  | 145519_at   |         |         |         |       |         |         |         |  |
| Sas10                                                                                | 11   |  | 152191_at   | 1.9 D S | 2.3 D S |         |       | 1.1 U   | 2.0 U   | 1.3 D   |  |
| CG12050                                                                              | -14  |  | 154526_at   | 1.6 D S | 1.9 D S |         | 1.4 D | 1.2 U   | 1.7 U   | 1.4 D   |  |
| CG6854                                                                               | 79   |  | 154401_at   | 1.8 D S | 1.8 D S |         | 1.4 D | 1.2 D   | 1.6 U   | 1.0 D   |  |
| bic                                                                                  | 48   |  | 153308_at   | 2.0 D S | 1.8 D S |         | 1.0 U | 1.2 U   | 1.0 D   | 1.2 D   |  |
| pont                                                                                 |      |  | 153627_at   | 1.3 D S | 1.7 D S |         | 1.4 D | 1.1 D   | 1.4 U   | 1.2 D   |  |
| Smr                                                                                  |      |  | 144015_at   | 1.2 D   | 1.7 D S |         | 1.3 D | 1.2 D   | 1.2 D   | 1.2 U   |  |
| CG32133                                                                              |      |  | 142630_at   |         |         |         |       |         |         |         |  |
|                                                                                      |      |  | 148738_at   | 1.5 D   | 1.7 D S |         | 1.4 D |         | 1.1 D   | 1.1 U   |  |
| l(3)mbt                                                                              |      |  | 141950_at   |         |         |         |       |         |         |         |  |
|                                                                                      |      |  | 142550_at   | 1.5 D   | 1.6 D S |         | 1.1 D | 1.4 D   | 1.0 U   | 1.4 U   |  |
| bel                                                                                  |      |  | 149514_at   | 1.0 U   | 1.6 D S |         | 1.3 D | 1.5 D   | 1.1 U   | 1.0 U   |  |
| CG3711                                                                               |      |  | 144357_at   | 1.0 D   | 1.5 D S |         | 1.1 D |         | 1.4 D   | 1.4 U   |  |
| CG8319                                                                               |      |  | 149571_at   | 1.4 D   | 1.5 D S |         | 1.0 U | 1.0 D   | 1.1 U   | 1.3 D   |  |
| Max                                                                                  | 429  |  | 153406_at   | 1.4 D   | 1.1 U   |         | 1.2 D | 1.3 D   | 2.7 U S | 1.1 U   |  |
| CG5033                                                                               | 21   |  | 154156_at   | 1.6 D S | 2.2 D S | 1.8 D S | 1.2 D |         | 1.8 U S | 1.3 D   |  |
| <b>Protein modification / protein degradation / ubiquitination / protein folding</b> |      |  |             |         |         |         |       |         |         |         |  |
| Su(dx)                                                                               | 864  |  | 142800_at   | 1.7 D S | 1.0 U   |         | 1.5 U | 1.3 D   | 1.3 U   | 1.0 U   |  |
|                                                                                      |      |  | 151689_s_at | 1.2 D   | 1.2 D   |         | 1.1 U | 1.4 D   | 1.1 D   | 1.0 U   |  |
| Nmt                                                                                  |      |  | 153290_at   | 1.1 U   | 1.1 D   |         | 1.1 U | 1.2 D   | 1.7 U S | 1.1 D   |  |
| Hsc70-5                                                                              |      |  | 153311_at   | 2.2 D S | 1.4 D   |         | 1.1 D | 1.0 U   | 1.0 D   | 1.2 D   |  |
| Hsp68                                                                                |      |  | 143197_at   | 1.0 U   | 1.2 D   |         | 1.4 U | 8.8 U S | 1.9 U S | 1.4 U   |  |

|           |      |     |  |             |         |         |         |         |         |       |
|-----------|------|-----|--|-------------|---------|---------|---------|---------|---------|-------|
| Roe1      |      |     |  | 153163_at   | 1.0 U   | 1.6 D S | 1.3 D   | 1.9 D   | 1.0 D   | 1.1 D |
| Ubi-p63E  |      |     |  | 143399_at   | 1.1 D   | 1.1 D   | 1.0 D   | 1.1 U   | 1.6 D S | 1.0 D |
| eff       |      |     |  | 143638_at   | 1.5 D S | 1.1 U   | 1.4 U   | 1.0 D   | 1.2 U   | 1.1 D |
| ago       |      |     |  | 148159_at   | 1.0 D   | 1.8 D S | 1.3 D   | 1.4 D   | 1.2 D   | 1.1 U |
| CG7288    | 480  |     |  | 142850_at   |         |         |         |         |         |       |
|           |      |     |  | 151701_s_at | 1.1 D   | 1.0 U   | 1.1 U   | 1.3 D   | 1.1 U   | 1.2 U |
|           |      |     |  | 151702_r_at |         |         |         |         | 4.3 D S | 1.3 U |
| CG4165    | -928 |     |  | 154700_at   | 1.5 D   | 2.0 D S | 1.1 U   | 1.6 D   | 1.0 U   | 1.3 D |
| CG32479   |      |     |  | 142762_at   | 1.2 U   | 1.4 D S | 1.2 D   |         | 1.1 D   | 1.1 D |
|           |      |     |  | 147948_at   | 1.2 D   | 1.8 D S | 1.3 D   | 1.6 D   | 1.4 D   | 1.1 U |
|           |      |     |  | 151677_at   | 1.6 D S | 1.1 D   | 1.4 U   | 1.1 U   | 1.2 U   | 1.1 D |
| FK506-bp1 | -114 | 216 |  | 154545_at   | 1.7 D S | 1.9 D S | 1.7 D S | 1.0 D   | 1.4 U   | 1.3 D |
| Tbp-1     |      |     |  | 152417_at   | 1.0 D   | 1.0 D   | 1.1 D   | 1.3 D   | 2.2 D S | 1.1 U |
| CG3033    |      |     |  | 152024_at   | 1.6 D S | 1.2 U   | 1.1 U   | 1.1 D   |         | 1.4 U |
| Trp1      |      |     |  | 143663_at   | 1.3 D   | 1.1 U   | 1.4 U   | 1.2 U   | 2.2 D S | 1.3 U |
| CG9455    | 627  | 645 |  | 146701_at   | 1.5 U S | 1.1 U   | 1.1 D   | 1.4 D   |         |       |
| ApepP     |      |     |  | 153980_at   | 1.5 U S | 1.1 D   | 1.0 D   | 1.1 D   | 1.4 U   | 1.1 U |
| CG10460   |      |     |  | 147497_at   | 1.1 D   | 1.8 U S | 1.1 U   | 1.3 U   | 1.1 U   | 1.1 D |
| Kaz1      |      |     |  | 144142_at   | 1.1 D   | 1.2 U   | 2.8 U S | 1.1 D   |         |       |
| CG13283   |      |     |  | 146385_at   | 1.2 D   | 1.0 U   | 2.4 U S | 1.9 U   |         |       |
| Cys       | 530  |     |  | 142095_at   |         |         |         |         |         |       |
|           |      |     |  | 142969_at   | 1.1 D   | 1.3 U   | 2.3 U S | 1.4 U   | 1.5 U   | 1.1 D |
| CG4398    |      |     |  | 147309_at   |         |         | 1.9 U S | 3.3 U S |         |       |
| Psa       |      |     |  | 141811_at   | 1.2 D   | 1.1 U   | 1.2 U   | 1.0 D   | 2.1 D S | 1.1 D |
| sda       |      |     |  | 152119_at   | 1.4 D   | 1.1 D   | 1.2 U   | 2.8 U S | 2.0 D S | 1.0 U |
| Fpps      | -600 |     |  | 153220_at   | 1.1 U   | 1.0 D   | 1.4 U   | 1.7 U   | 1.9 D S | 1.0 D |
| CG2947    | 499  |     |  | 141203_at   | 2.2 D S | 1.3 D   | 1.0 D   | 1.1 D   | 1.2 U   | 1.2 D |
| CG11357   |      |     |  | 142460_at   | 1.1 U   | 1.1 D   | 1.0 D   | 1.2 D   | 1.2 D   | 1.1 D |
|           |      |     |  | 151577_at   | 2.0 D S | 1.0 U   | 1.4 U   | 1.0 U   | 1.2 U   | 1.2 U |
| PNGase    |      |     |  | 146663_at   | 1.9 D S | 1.1 D   | 1.3 U   | 1.3 D   | 1.1 U   | 1.1 D |
| CG18177   |      |     |  | 141205_at   | 1.7 D S | 1.3 D   | 1.2 U   | 1.0 D   | 1.4 U   | 1.2 D |
| CG6357    |      |     |  | 153233_at   | 1.6 D S | 1.2 U   | 2.0 U S | 1.5 U   | 2.0 U   | 1.1 U |
| olf186-F  | 852  |     |  | 141803_at   | 1.6 D S | 1.0 U   | 1.5 U   | 1.0 U   | 1.0 D   | 1.0 D |
| CG10576   | 773  |     |  | 154529_at   | 1.6 D S | 1.4 D S | 1.2 D   | 1.3 D   | 1.1 D   | 1.2 D |
| CG11261   |      |     |  | 154496_at   | 1.5 D S | 1.1 D   | 1.1 U   | 1.3 U   |         |       |
| Tequila   |      |     |  | 141527_at   | 1.1 D   | 1.2 U   | 1.6 U S | 1.0 U   |         |       |
|           |      |     |  | 148446_at   | 1.2 U   | 1.2 D   | 1.5 U S | 1.6 D   |         | 1.3 U |
|           |      |     |  | 153070_at   | 1.5 D S | 1.1 U   | 1.5 U   | 1.2 D   | 1.7 D   | 1.0 D |



|                             |      |     |  |           |         |         |         |         |       |         |  |         |
|-----------------------------|------|-----|--|-----------|---------|---------|---------|---------|-------|---------|--|---------|
| CG2911                      | -663 |     |  | 149343_at | 1.5 D S | 1.0 U   |         | 1.2 U   | 1.1 D |         |  | 1.1 U   |
| Ogt                         |      |     |  | 153888_at | 1.5 D S | 1.1 D   |         | 1.2 U   | 1.1 U | 1.1 U   |  | 1.0 U   |
| CG16840                     | -414 |     |  | 146218_at | 1.7 D S | 2.4 D S |         | 1.7 D   | 1.2 D | 1.9 U   |  | 1.4 D   |
| CG12202                     | 101  |     |  | 141774_at | 1.4 D   | 1.9 D S |         | 1.6 D   | 1.5 D | 1.5 U   |  | 1.3 U   |
| CG10565                     | 441  |     |  | 154210_at | 1.6 D S | 1.8 D S |         | 1.3 D   | 1.0 U | 1.6 U   |  | 1.2 D   |
| CG5358                      | 655  |     |  | 149600_at | 1.2 D   | 1.7 D S |         | 1.5 D   |       | 1.1 D   |  | 1.1 D   |
| REG                         |      |     |  | 155140_at | 1.4 D S | 1.6 D S |         | 1.3 D   | 1.1 D | 1.2 U   |  | 1.1 D   |
| CG12582                     |      |     |  | 149266_at | 1.2 D   | 1.6 D S |         | 1.1 D   |       |         |  | 1.1 U   |
|                             |      |     |  | 152253_at | 1.0 D   | 1.0 D   |         | 1.2 U   | 1.1 D | 1.1 U   |  | 1.1 U   |
| Trap1                       |      |     |  | 155020_at | 1.0 D   | 1.6 D S |         | 1.1 U   | 1.1 U | 1.6 U   |  | 1.1 D   |
| CG6554                      |      |     |  | 154448_at | 1.7 D S | 1.6 D S |         | 1.3 D   | 1.4 D | 1.2 U   |  | 1.1 D   |
| CG11989                     |      |     |  | 153956_at | 1.2 D   | 1.5 D S | 1.6 D S | 1.2 D   |       | 1.4 U   |  | 1.1 D   |
| und                         |      |     |  | 151903_at | 1.4 D S | 1.7 D S | 1.5 D S | 1.0 U   |       | 1.4 U   |  | 1.1 D   |
| CG6563                      | 55   |     |  | 154690_at | 2.4 D S | 2.5 D S |         | 1.8 D   | 1.2 D | 2.9 U S |  | 1.8 D S |
| CG4826                      |      |     |  | 152851_at | 1.1 D   | 1.1 U   |         | 1.6 U   | 1.1 D | 2.8 U S |  |         |
| GlcAT-S                     |      |     |  | 152665_at | 1.9 D S | 1.1 D   |         | 1.2 U   | 1.1 D | 2.3 U S |  | 1.1 U   |
| CG7182                      |      |     |  | 153998_at | 1.9 D S | 1.6 D S |         | 1.4 D   | 1.0 U | 1.9 U S |  | 1.1 D   |
| <b>Channels / transport</b> |      |     |  |           |         |         |         |         |       |         |  |         |
| Fbp1                        |      |     |  | 143158_at |         |         |         |         |       | 1.0 U   |  | 3.4 D S |
| Csat                        |      |     |  | 144045_at | 1.7 U S | 1.0 D   |         | 1.3 U   | 1.4 D | 1.4 D   |  | 1.2 U   |
| CG5594                      |      |     |  | 147816_at | 1.1 D   | 1.5 D S |         | 1.1 D   |       |         |  |         |
|                             |      |     |  | 152231_at | 1.5 D   | 1.1 D   |         | 1.5 U   | 1.1 D |         |  |         |
| Mpcp                        |      |     |  | 144140_at | 1.6 D S | 1.3 D   |         | 1.0 D   | 1.2 D | 1.1 U   |  | 1.4 D   |
| CG3071                      | 11   | 942 |  | 155028_at | 1.9 D S | 1.8 D S |         | 1.6 D   | 1.1 D | 2.4 U S |  | 1.2 D   |
| CG11147                     |      |     |  | 145844_at | 1.5 U S |         |         |         |       |         |  |         |
| CG13688                     |      |     |  | 145539_at | 1.5 U S | 1.1 U   |         | 1.1 D   | 1.1 U |         |  | 1.3 U   |
| CG4330                      |      |     |  | 153453_at |         | 1.1 D   |         | 1.7 U S | 1.3 U |         |  | 1.3 U   |
| CG8468                      |      |     |  | 143046_at | 1.1 U   | 1.3 D   |         | 1.1 D   | 1.2 D | 1.5 D   |  | 1.2 U   |
|                             |      |     |  | 151760_at | 1.3 D   | 1.1 D   |         | 1.0 U   | 1.0 U | 2.0 D S |  | 1.1 U   |
| mnd                         |      |     |  | 143268_at | 2.2 D S | 1.4 D S |         | 1.1 U   | 1.3 D | 1.6 U   |  | 1.4 D   |
| CG6070                      | -252 |     |  | 152204_at | 2.0 D S | 1.2 D   |         | 1.1 U   | 1.1 D |         |  | 1.1 U   |
| CG16753                     |      |     |  | 155163_at | 1.9 D S | 1.4 D   |         | 1.4 D   | 1.4 U | 1.1 U   |  | 1.1 U   |
| CG10960                     |      |     |  | 153366_at | 1.9 D S | 1.1 U   |         | 1.2 U   | 1.5 U | 1.5 U   |  | 1.0 U   |
| CG8029                      | -807 |     |  | 153649_at | 1.9 D S | 1.2 D   |         | 1.0 U   | 1.1 D | 1.0 D   |  | 1.1 D   |
| hoe1                        |      |     |  | 145791_at | 1.8 D S | 1.1 D   |         | 1.1 U   | 2.0 U |         |  |         |
|                             |      |     |  | 145792_at |         |         |         |         |       |         |  |         |
|                             |      |     |  | 151864_at | 1.0 U   | 1.1 U   |         |         |       |         |  |         |
| CG2162                      |      |     |  | 154920_at | 1.8 D S | 1.0 D   |         | 1.0 U   | 1.1 U | 1.3 U   |  | 1.1 U   |

|                                |      |     |  |           |         |         |  |         |  |       |  |         |  |         |
|--------------------------------|------|-----|--|-----------|---------|---------|--|---------|--|-------|--|---------|--|---------|
| CG13384                        |      |     |  | 141633_at | 1.8 D S | 1.2 D   |  | 1.4 U   |  | 1.2 D |  | 1.3 U   |  | 1.3 U   |
| Ent2                           | 87   |     |  | 152416_at | 1.7 D S | 1.3 D S |  | 1.2 D   |  | 1.3 D |  | 1.1 D   |  | 1.0 D   |
| CG5789                         | 93   |     |  | 154494_at | 1.7 D S | 1.2 D   |  | 1.2 U   |  | 1.2 D |  | 1.8 U   |  | 1.3 D   |
| CG11092                        | 876  |     |  | 153989_at | 1.7 D S | 1.2 D   |  | 1.3 U   |  | 1.3 U |  | 1.2 D   |  | 1.0 D   |
| sesB                           |      |     |  | 141933_at | 1.1 U   | 1.0 U   |  | 1.1 U   |  | 1.1 D |  | 1.2 U   |  | 1.2 D   |
|                                |      |     |  | 142494_at | 1.7 D S | 1.2 D   |  | 1.0 U   |  | 1.0 D |  | 1.0 D   |  | 1.1 D   |
| CG7255                         | -808 |     |  | 141761_at | 1.6 D S | 1.0 D   |  | 1.2 U   |  | 1.0 D |  |         |  |         |
| CG6454                         | -762 |     |  | 154732_at | 1.6 D S | 1.3 D   |  | 1.1 U   |  | 1.3 D |  | 1.0 U   |  | 1.1 U   |
| Nup358                         |      |     |  | 155002_at | 1.6 D S | 1.2 D   |  | 1.2 U   |  | 1.1 U |  | 1.0 D   |  | 1.0 D   |
| CG3164                         |      |     |  | 145511_at | 1.6 D S | 1.1 U   |  | 1.2 U   |  | 1.2 D |  | 1.1 D   |  | 1.0 D   |
| CG9330                         |      |     |  | 149061_at | 1.6 D S | 1.3 D   |  | 1.1 U   |  | 1.1 D |  | 1.2 U   |  | 1.2 U   |
| Fatp                           |      |     |  | 141619_at | 1.5 D S | 1.0 U   |  | 1.4 U   |  | 1.0 D |  | 1.3 D   |  | 1.4 U   |
| CG12295                        | -627 |     |  | 141545_at | 1.3 D   | 2.3 D S |  | 1.9 D   |  | 1.6 D |  |         |  |         |
| CG6565                         |      |     |  | 153542_at | 1.5 D S | 2.0 D S |  | 1.2 U   |  | 1.2 D |  | 1.2 U   |  | 1.1 D   |
| CG7686                         |      |     |  | 154018_at | 1.4 D S | 1.7 D S |  | 1.4 D   |  | 1.1 D |  | 1.4 U   |  | 1.4 D   |
| CG6756                         |      |     |  | 146265_at | 2.0 D S | 1.5 D S |  | 1.3 D   |  | 1.0 U |  | 1.4 U   |  | 1.1 D   |
| CG9281                         | 28   | 799 |  | 153481_at | 1.3 D S | 1.5 D S |  | 1.5 D   |  | 1.0 U |  | 1.2 U   |  | 1.3 D   |
| CG30394                        | 602  |     |  | 147617_at | 1.3 D   | 1.0 D   |  | 1.2 U   |  | 1.1 D |  | 1.1 U   |  | 1.2 U   |
|                                |      |     |  | 147618_at | 1.2 U   | 1.5 D S |  | 1.2 D   |  | 1.3 D |  | 1.5 D   |  | 1.1 U   |
| Tom40                          |      |     |  | 144654_at | 1.2 D   | 1.7 D S |  | 1.7 D S |  | 1.7 D |  | 1.8 U   |  | 1.0 D   |
| mge                            |      |     |  | 141387_at | 1.4 D S | 1.4 D S |  | 1.6 D S |  | 1.4 D |  | 1.5 U   |  | 1.0 D   |
| bys                            | -47  | 23  |  | 153812_at | 1.5 D S |         |  |         |  | 1.0 D |  | 2.2 U S |  | 1.3 D   |
| CG6574                         | -387 |     |  | 149652_at | 1.3 D   | 1.6 D   |  | 1.0 U   |  | 1.1 U |  | 2.1 U S |  | 1.1 U   |
| CG13610                        | 123  |     |  | 141731_at | 1.0 D   | 1.2 U   |  | 1.1 D   |  | 1.2 D |  | 2.0 U S |  | 1.2 D   |
| CG6712                         | 46   |     |  | 154160_at | 2.6 D S | 3.7 D S |  | 2.8 D S |  | 1.4 D |  | 2.0 U S |  | 2.0 D S |
| CG17723                        | 181  |     |  | 154124_at | 1.2 U   | 1.0 U   |  | 1.2 D   |  | 1.3 D |  | 1.9 U S |  | 1.1 U   |
| CG2691                         | 36   |     |  | 154451_at | 2.1 D S | 2.4 D S |  | 1.7 D   |  | 1.0 U |  | 1.8 U S |  | 1.2 D   |
| CG7627                         |      |     |  | 142113_at |         |         |  |         |  |       |  |         |  |         |
|                                |      |     |  | 143031_at | 1.1 D   | 1.2 D   |  | 1.1 D   |  | 1.3 D |  | 1.8 U S |  | 1.1 D   |
| <b>Metabolism / catabolism</b> |      |     |  |           |         |         |  |         |  |       |  |         |  |         |
| Pgi                            |      |     |  | 152515_at | 1.0 U   | 1.1 U   |  | 1.0 D   |  | 1.2 D |  | 1.7 D S |  | 1.0 U   |
| Pepck                          |      |     |  | 143299_at | 1.0 D   | 1.1 U   |  | 1.9 U   |  | 1.1 U |  | 4.0 D S |  | 3.0 U S |
| Prat                           | 387  |     |  | 154976_at | 1.7 D S | 1.5 D   |  | 1.2 D   |  | 1.2 D |  | 1.5 U   |  | 1.0 U   |
| ade2                           | -460 | 32  |  | 153122_at | 1.3 D   | 1.5 D S |  | 1.2 D   |  | 1.0 U |  | 1.7 U   |  | 1.1 D   |
| Jafrac1                        |      |     |  | 153359_at | 1.3 U S | 1.1 U   |  | 1.0 U   |  | 1.0 U |  | 2.0 D S |  | 1.1 D   |
| r-l                            | 58   | 370 |  | 155103_at |         |         |  |         |  | 1.1 D |  | 3.4 U S |  | 1.2 D   |
| CG8005                         |      |     |  | 148379_at | 1.8 D S | 2.1 D S |  | 1.4 D   |  | 1.5 D |  |         |  |         |
| dnk                            | 143  | 677 |  | 143954_at | 1.1 D   | 1.0 U   |  | 1.0 U   |  | 1.2 D |  | 2.0 D S |  | 1.1 U   |

|                                                      |      |     |  |           |         |         |         |       |         |         |
|------------------------------------------------------|------|-----|--|-----------|---------|---------|---------|-------|---------|---------|
| Dph5                                                 | 25   |     |  | 153752_at | 1.4 D S | 1.9 D S | 1.4 D   | 1.0 U | 1.6 U   | 1.3 D   |
| ras                                                  |      |     |  | 154756_at | 2.2 D S | 3.1 D S | 1.4 D   | 1.2 D | 1.9 U S | 1.4 D   |
| ifc                                                  |      |     |  | 153842_at | 1.5 D S | 1.0 U   | 1.2 U   | 1.5 D | 1.0 D   | 1.1 U   |
| Inos                                                 |      |     |  | 153296_at | 1.5 U S | 1.7 U S | 1.0 D   | 1.1 D | 1.2 U   | 1.1 D   |
| CG32549                                              |      |     |  | 145298_at |         |         |         |       |         | 1.1 D   |
|                                                      |      |     |  | 151352_at | 1.0 U   |         | 1.3 U   |       |         |         |
|                                                      |      |     |  | 152283_at | 1.0 U   | 1.6 U S | 1.1 U   | 1.6 D | 1.0 D   | 1.0 D   |
| Ect3                                                 |      |     |  | 153367_at | 1.1 U   | 1.2 U   | 1.7 U S | 1.4 U |         | 1.2 U   |
| l(1)G0237                                            |      |     |  | 144884_at | 1.2 D   | 1.1 U   | 1.1 U   | 1.4 D | 6.9 D S | 1.1 U   |
| Tpi                                                  |      |     |  | 152334_at |         |         |         |       | 2.2 D S | 1.2 D   |
| CG3523                                               |      |     |  | 152126_at | 1.4 D   | 1.0 U   | 1.2 U   | 1.1 D | 1.0 D   | 1.5 U S |
| CG8839                                               |      |     |  | 153538_at | 1.3 U S | 1.1 U   | 1.1 U   | 1.3 D | 1.2 U   | 1.5 U S |
| CG7351                                               |      |     |  | 151973_at | 2.0 D S | 1.1 D   | 1.1 U   | 1.2 D | 1.1 U   | 1.1 U   |
| Nc73EF                                               |      |     |  | 141810_at | 1.9 D S | 1.1 D   | 1.1 U   | 1.1 D | 1.1 D   | 1.1 D   |
| CG3045                                               | 97   |     |  | 152572_at | 1.9 D S | 1.5 D   | 1.2 D   | 1.3 D | 1.3 U   | 1.1 U   |
| CG11055                                              |      |     |  | 154767_at | 1.6 D S | 1.1 D   | 1.3 U   | 1.4 D | 1.7 D   | 1.1 U   |
| CG5191                                               |      |     |  | 152563_at | 1.6 D S | 1.0 U   | 1.3 U   | 1.3 U | 1.4 U   | 1.1 U   |
| CG8128                                               |      |     |  | 151908_at | 1.6 D S | 1.2 D   | 1.1 D   | 1.0 U | 1.4 U   | 1.0 D   |
| CG1236                                               | -527 | 773 |  | 141292_at | 1.6 D S | 1.0 D   | 1.0 D   | 1.0 U |         | 1.1 D   |
| CG1753                                               |      |     |  | 154013_at | 1.4 D   | 2.0 D S | 1.3 D   | 1.1 U | 1.8 U   | 1.3 D   |
| CG13667                                              |      |     |  | 154330_at | 1.6 D   | 1.8 D S | 1.1 D   | 1.1 U | 1.9 U   | 1.2 U   |
| CG11844                                              | 906  |     |  | 141666_at | 1.2 D   | 1.7 D S | 1.6 D   | 1.2 D | 1.1 U   | 1.2 D   |
| CG11739                                              |      |     |  | 149275_at |         |         |         |       | 3.8 U S | 1.1 U   |
| CG16733                                              |      |     |  | 149540_at |         |         |         |       | 3.2 U S | 1.1 U   |
| CG6767                                               | -336 | 240 |  | 148484_at | 1.3 D   | 1.6 D S | 1.1 D   | 1.5 D | 2.5 U S | 1.1 U   |
| CG3590                                               | -941 |     |  | 150041_at | 1.1 D   | 1.0 D   | 1.2 D   | 1.3 D | 2.5 U S | 1.0 U   |
| CG3902                                               |      |     |  | 149018_at |         |         |         |       |         |         |
|                                                      |      |     |  | 152151_at | 1.2 U   | 1.0 U   | 1.0 D   | 1.1 U | 2.4 U S | 1.1 U   |
| CG6287                                               |      |     |  | 151909_at |         |         |         |       | 2.2 U S | 1.0 D   |
| l(2)k01209                                           |      |     |  | 153506_at | 1.7 D   | 1.2 D   | 1.4 D   | 1.2 U | 2.2 U S | 1.7 D   |
| CG9436                                               |      |     |  | 142716_at | 1.2 U   | 1.2 U   | 1.1 U   | 1.2 D | 2.1 U S | 1.0 D   |
| CG1671                                               |      |     |  | 141261_at | 1.5 D   | 1.5 D   | 1.2 D   | 1.2 D | 2.0 U S | 1.3 D   |
| CG11089                                              | 219  |     |  | 153761_at |         |         | 1.5 D   | 1.2 D | 1.9 U S | 1.3 D   |
| Lsd-2                                                |      |     |  | 145098_at |         |         |         |       | 1.9 U S | 1.0 D   |
| CG4686                                               |      |     |  | 150222_at | 1.1 D   | 1.1 U   | 1.1 U   | 1.3 D | 1.8 U S | 1.2 U   |
| <b>Cytoskeleton / cell migration / cell adhesion</b> |      |     |  |           |         |         |         |       |         |         |
| l(2)gl                                               |      |     |  | 153565_at | 2.0 D S | 1.1 D   | 1.2 U   | 1.0 U | 1.8 D   | 1.1 U   |
| pyd                                                  |      |     |  | 149529_at | 1.1 U   | 1.3 D   | 1.2 D   | 1.8 D | 1.8 D   | 1.2 U   |







|                                        |      |      |    |             |         |         |         |       |  |         |         |  |
|----------------------------------------|------|------|----|-------------|---------|---------|---------|-------|--|---------|---------|--|
| nop5                                   | -509 | -9   |    | 154624_at   | 1.7 D S | 2.7 D S | 2.6 D S | 1.1 U |  | 2.5 U S | 1.6 D S |  |
| Nnp-1                                  | 29   |      |    | 146333_at   | 1.7 D S | 2.4 D S | 2.5 D S | 1.0 D |  | 1.9 U S | 1.3 D   |  |
| CG11837                                |      |      |    | 154750_at   | 2.0 D S | 2.2 D S | 1.7 D   | 1.0 D |  | 3.1 U S | 1.3 D   |  |
| Surf6                                  | 31   |      |    | 143036_at   | 1.8 D S | 1.9 D S | 1.5 D   | 1.3 U |  |         | 1.2 D   |  |
| Rs1                                    | 10   |      |    | 153844_at   | 2.1 D S | 2.8 D S | 1.6 D   | 1.0 U |  | 2.2 U S | 1.5 D   |  |
| l(1)1Bi                                | 21   |      |    | 153663_at   | 3.0 D S |         | 2.3 D   | 1.0 U |  | 1.8 U   | 1.2 D   |  |
| CG5220                                 | 254  |      |    | 154071_at   | 1.8 D S | 1.3 D   | 1.1 D   | 1.0 U |  | 1.7 U   | 1.1 D   |  |
| Tif-IA                                 | 759  |      |    | 146622_at   | 2.1 D S | 2.0 D S | 1.1 D   |       |  | 1.3 U   | 1.2 D   |  |
|                                        |      |      |    | 146623_at   | 1.6 D   | 2.2 D S | 1.4 D   | 1.0 U |  | 1.2 U   | 1.0 U   |  |
|                                        |      |      |    | 153698_at   | 2.2 D S | 1.9 D S | 1.1 D   | 1.3 U |  | 1.4 U   | 1.0 D   |  |
| CG12909                                | 12   | 123  |    | 146936_at   | 2.2 D S | 2.1 D S | 1.6 D   | 1.2 U |  | 2.2 U   | 1.3 D   |  |
| CG7911                                 | -643 | -307 | 15 | 150866_at   | 1.4 D S | 1.6 D S | 1.4 D   | 1.0 D |  | 1.5 U   | 1.2 D   |  |
| Nop56                                  | 29   |      |    | 153330_at   | 1.6 D S | 2.5 D S | 2.5 D S | 1.1 U |  | 3.2 U S | 1.4 D S |  |
| CG5728                                 | 31   | 789  |    | 154959_at   | 1.9 D S | 2.4 D S | 1.7 D S | 1.1 U |  | 2.6 U S | 1.4 D   |  |
| NHP2                                   | 41   |      |    | 141956_at   |         |         |         |       |  |         |         |  |
|                                        |      |      |    | 142579_at   | 2.0 D S | 2.5 D S | 2.3 D S | 1.0 D |  | 2.5 U S | 1.5 D   |  |
| CG10685                                |      |      |    | 146481_at   | 1.4 D S | 1.8 D S | 1.4 D   | 1.1 D |  | 2.4 U S | 1.3 D   |  |
| La                                     | 351  |      |    | 143668_at   | 1.9 D S | 1.5 D S | 1.4 D   | 1.1 D |  | 2.1 U S | 1.2 D   |  |
| <b>Translation / protein synthesis</b> |      |      |    |             |         |         |         |       |  |         |         |  |
| CG6388                                 | -1   |      |    | 154663_at   | 1.5 D S | 1.7 D S | 1.4 D   | 1.0 D |  | 1.8 U   | 1.2 D   |  |
| Rpp30                                  |      |      |    | 152046_at   | 1.7 D S | 1.6 D S | 1.3 D   | 1.0 D |  | 1.6 U   | 1.1 D   |  |
| Nmd3                                   | 16   |      |    | 153358_at   | 1.6 D S | 1.8 D S | 1.5 D   | 1.2 D |  | 1.8 U   | 1.3 D   |  |
| pelo                                   | -977 |      |    | 154677_at   | 2.1 D S | 1.3 D   | 1.1 U   | 1.2 D |  | 1.1 U   | 1.0 U   |  |
| RpS14a                                 | 223  |      |    | 143460_at   | 1.6 D S | 1.2 U   | 1.0 D   | 1.6 U |  | 1.1 U   | 1.1 D   |  |
| mRpL1                                  |      |      |    | 154580_at   | 1.5 D S | 1.2 D   | 1.0 D   | 1.0 D |  | 1.8 U   | 1.1 D   |  |
| CG8495                                 |      |      |    | 149586_at   | 1.8 D S | 1.9 D S | 1.6 D   | 1.2 U |  | 1.0 D   | 1.0 U   |  |
| CG4866                                 |      |      |    | 147369_at   | 1.5 D   | 1.9 D S | 1.5 D   | 1.0 U |  | 2.3 U S | 1.3 D   |  |
| eIF-4E                                 |      |      |    | 141629_at   | 1.3 D S | 1.1 D   | 1.1 D   | 1.0 U |  | 1.7 U S | 1.0 D   |  |
| eIF-4G                                 |      |      |    | 153267_at   | 1.9 D S | 1.4 D S | 1.1 D   | 1.0 U |  | 1.0 U   | 1.1 D   |  |
| CG8443                                 |      |      |    | 142634_at   | 1.5 D   | 1.9 D S | 1.3 D   |       |  | 1.0 U   | 1.1 D   |  |
|                                        |      |      |    | 151655_at   |         | 1.0 D   |         |       |  | 1.6 U   | 1.0 U   |  |
| clF2                                   |      |      |    | 148110_i_at | 1.4 U S | 1.3 D S | 1.2 D   | 1.3 D |  | 1.1 D   | 1.0 U   |  |
|                                        |      |      |    | 148111_r_at | 1.1 U   | 1.3 D S | 1.1 D   | 1.5 D |  | 1.1 U   | 1.0 U   |  |
|                                        |      |      |    | 148112_at   | 1.1 D   | 1.7 D S | 1.3 D   |       |  |         | 1.0 D   |  |
| AGO2                                   |      |      |    | 151275_r_at |         |         |         |       |  |         |         |  |
|                                        |      |      |    | 151276_f_at | 1.0 D   | 1.5 D S | 1.3 D   | 1.6 D |  | 1.3 D   | 1.0 U   |  |
|                                        |      |      |    | 153226_at   | 1.1 D   | 1.0 D   | 1.1 D   | 1.4 D |  | 2.6 D S | 1.1 D   |  |
| CG10192                                |      |      |    | 141569_at   | 1.7 D S | 1.0 D   | 1.1 U   | 1.0 U |  | 1.2 D   | 1.3 U   |  |

|                        |      |      |  |             |         |         |         |       |         |         |
|------------------------|------|------|--|-------------|---------|---------|---------|-------|---------|---------|
| EfTuM                  | 595  |      |  | 142510_at   | 1.3 D   | 1.8 D S | 1.7 D   | 1.1 D | 1.5 U   | 1.3 D   |
| Ef1&ggr                |      |      |  | 150815_at   | 1.0 U   | 1.5 D S | 2.3 D S | 1.0 U | 1.3 U   | 1.1 D   |
| eEF1&dgr               | -276 | 202  |  | 153449_at   | 1.5 D S | 1.6 D S | 1.2 D   | 1.1 U | 1.8 U S | 1.1 D   |
| Aats-arg               | 592  |      |  | 145157_at   | 1.7 D S | 1.5 D   | 1.0 D   | 1.3 D | 1.1 U   | 1.0 D   |
| Aats-tyr               | -804 |      |  | 142649_at   | 1.2 U   | 1.4 D S | 1.8 D S | 1.3 D | 1.3 U   | 1.3 D   |
| Aats-ile               |      |      |  | 154387_at   | 1.9 D S | 1.7 D S | 1.4 D   | 1.0 D | 1.1 U   | 1.1 D   |
| Aats-cys               |      |      |  | 142650_s_at | 1.8 D S | 1.1 D   | 1.1 D   | 1.1 U |         | 1.1 D   |
| CG6479                 |      |      |  | 153108_at   | 1.5 D S | 1.1 D   | 1.1 D   | 1.3 D | 1.3 D   | 1.1 D   |
| CG4045                 |      |      |  | 153114_at   | 1.3 D   | 1.9 D S | 1.3 D   | 1.5 D | 1.1 U   | 1.3 D   |
| CG4159                 | -204 |      |  | 150267_at   | 1.7 D S | 1.7 D S | 1.6 D   | 1.1 D | 2.0 U   | 1.5 D   |
| Nac&agr                | -674 |      |  | 152402_at   | 1.1 D   | 1.2 D S | 1.8 D S | 1.1 D | 1.0 U   | 1.4 D S |
| CG13096                | -656 | 27   |  | 142984_at   | 1.3 D   | 1.4 D S | 1.9 D S | 1.2 U | 2.0 U S | 1.4 D   |
| <b>mRNA processing</b> |      |      |  |             |         |         |         |       |         |         |
| heph                   |      |      |  | 150961_at   |         |         |         |       |         |         |
|                        |      |      |  | 153488_at   | 1.2 D   | 1.4 D   | 1.2 D   | 1.3 D | 2.0 D S | 1.2 U   |
| CG4266                 |      |      |  | 154472_at   | 1.9 D S | 1.1 U   | 1.1 U   | 1.1 D | 1.0 U   | 1.1 D   |
| hoip                   | -15  |      |  | 146098_at   | 1.6 D S | 3.4 D S | 2.0 D S | 1.0 D | 3.7 U S | 1.7 D S |
| CG5931                 |      |      |  | 153263_at   | 1.9 D S | 1.1 D   | 1.1 D   | 1.1 U | 1.1 D   | 1.1 U   |
| Dek                    |      |      |  | 153681_at   | 1.7 D S | 1.0 U   | 1.1 U   | 1.0 U | 1.3 D   | 1.0 D   |
| CG6610                 |      |      |  | 148261_at   | 1.7 D S | 1.0 U   | 1.1 U   | 1.2 D | 1.9 U   | 1.1 U   |
| SF2                    |      |      |  | 154911_at   | 1.5 D S | 1.2 D   | 1.0 D   | 1.5 D | 1.1 D   | 1.0 U   |
| CG13900                | 155  | 369  |  | 147940_at   | 2.1 D S | 2.5 D S | 1.5 D   | 1.4 D | 1.0 D   | 1.1 D   |
| CG4901                 |      |      |  | 146130_at   | 1.7 D S | 1.9 D S | 1.2 D   | 1.1 D | 1.9 U S | 1.1 U   |
| cpsf                   |      |      |  | 154835_at   | 2.0 D S | 1.2 D   | 1.1 U   | 1.3 D | 1.0 D   | 1.2 D   |
| Pabp2                  |      |      |  | 143566_i_at | 1.7 D S | 1.1 D   | 1.2 U   | 1.2 U | 1.2 D   | 1.1 U   |
|                        |      |      |  | 143567_r_at |         |         |         |       |         |         |
| CG1972                 |      |      |  | 153639_at   | 1.6 D S | 1.0 U   | 1.3 U   | 1.1 U |         | 1.1 D   |
| Rtc1                   | 35   |      |  | 141535_at   | 1.8 D S | 2.1 D S | 1.5 D   | 1.1 D | 1.4 U   | 1.2 D   |
| CG30122                |      |      |  | 147452_at   | 1.5 D   | 2.1 D S | 1.2 D   |       | 1.5 D   | 1.2 U   |
|                        |      |      |  | 154274_at   | 1.1 D   | 1.0 D   | 1.0 D   | 1.2 D | 1.1 D   | 1.0 D   |
| CG8414                 |      |      |  | 147278_at   | 1.8 D S | 1.9 D S | 1.3 D   | 1.1 U | 1.5 U   | 1.4 D   |
| Rrp4                   |      |      |  | 153140_at   | 1.2 D   | 1.8 D S | 1.6 D   | 1.2 D | 1.3 U   | 1.2 D   |
| Ski6                   | 41   |      |  | 146317_at   | 1.7 D S | 1.8 D S | 1.4 D   | 1.1 D | 1.4 U   | 1.2 D   |
| Rrp42                  |      |      |  | 147273_at   | 1.3 D   | 1.8 D S | 1.1 U   | 1.0 D | 1.9 U   | 1.1 U   |
| Rrp46                  |      |      |  | 153132_at   | 2.2 D S | 2.1 D S | 2.2 D S | 1.3 D | 1.6 U   | 1.1 D   |
| lp259                  |      |      |  | 153317_at   | 1.1 D   | 1.3 D S | 1.5 D S | 1.2 U | 1.0 D   | 1.2 D   |
| Dis3                   | -902 | -144 |  | 141818_at   | 1.5 D S | 2.6 D S |         | 1.2 U | 2.5 U S | 1.2 D   |
| CG10214                |      |      |  | 153933_at   | 2.3 D S | 2.0 D S | 1.1 U   | 1.2 D | 2.5 U S | 1.0 U   |



|                               |      |     |  |             |         |         |         |  |       |  |         |         |
|-------------------------------|------|-----|--|-------------|---------|---------|---------|--|-------|--|---------|---------|
| Csl4                          | 246  |     |  | 146231_at   | 2.0 D S | 1.9 D S | 1.4 D   |  | 1.1 D |  | 2.0 U S | 1.0 U   |
| <b>RNA binding</b>            |      |     |  |             |         |         |         |  |       |  |         |         |
| CG3335                        | -28  |     |  | 148477_at   |         |         |         |  | 1.1 D |  | 3.0 U S | 1.3 D   |
| CG5589                        | 25   |     |  | 142865_at   | 2.7 D S | 2.5 D S | 2.1 D   |  | 1.1 D |  | 3.0 U S | 1.5 D   |
| Dbp73D                        | -712 | 27  |  | 141976_at   |         |         |         |  |       |  |         |         |
|                               |      |     |  | 142656_at   | 2.8 D S | 1.8 D S | 1.7 D   |  | 1.2 D |  | 2.5 U S | 1.1 D   |
| CG9630                        |      |     |  | 152670_at   | 2.2 D S | 3.4 D S | 1.5 D   |  | 1.2 U |  | 2.4 U S | 1.6 D   |
| CG11920                       | 23   |     |  | 153152_at   | 3.5 D S | 2.0 D S | 1.2 D   |  | 1.1 D |  | 2.4 U S | 1.3 D   |
| CG9809                        | 32   | 587 |  | 149278_at   | 1.7 D S | 2.2 D S |         |  |       |  | 2.1 U S | 1.1 D   |
| CG3808                        | 29   | 633 |  | 141727_at   |         |         |         |  |       |  | 2.1 U S | 1.5 D   |
| CG9253                        | 16   |     |  | 146573_at   | 1.8 D S | 2.6 D S | 1.8 D   |  | 1.0 D |  | 2.1 U S | 1.0 U   |
| CG11738                       | 12   |     |  | 154039_at   | 1.4 D   | 2.1 D S | 1.6 D S |  | 1.1 U |  | 2.0 U S | 1.4 D   |
| CG6937                        | 11   |     |  | 150379_at   | 1.4 D S | 1.5 D S | 1.5 D   |  | 1.3 U |  | 1.8 U S | 1.3 D   |
| mod                           | -457 | 574 |  | 154081_at   | 1.8 D S | 1.8 D S | 1.4 D   |  | 1.2 U |  | 1.8 U S | 1.5 D S |
| Rnp4F                         |      |     |  | 154594_at   | 1.0 U   | 1.1 D   | 1.1 D   |  | 1.2 D |  | 1.1 U   | 1.7 U S |
| l(2)35Df                      |      |     |  | 152101_at   | 2.6 D S | 2.5 D S | 1.5 D   |  | 1.3 D |  | 1.8 U   | 1.5 D   |
| CG5800                        |      |     |  | 145251_at   | 2.1 D S | 2.2 D S | 1.4 D   |  | 1.1 D |  | 1.6 U   | 1.3 D   |
| CG14230                       | 225  | 345 |  | 154638_at   | 1.6 D S | 2.0 D S | 1.3 D   |  | 1.3 U |  | 2.1 U   | 1.1 D   |
| vig                           | -498 |     |  | 153593_at   | 1.7 D S | 1.9 D S | 1.3 D   |  | 1.0 D |  | 1.3 D   | 1.2 D   |
| pit                           |      |     |  | 155149_at   | 1.7 D S | 2.4 D S | 2.2 D S |  | 1.1 U |  | 1.8 U   | 1.4 D   |
| <b>Mitochondrial function</b> |      |     |  |             |         |         |         |  |       |  |         |         |
| Cpr                           |      |     |  | 141208_at   | 1.5 D S | 1.2 D   | 1.1 U   |  | 1.2 D |  | 1.0 D   | 1.2 U   |
| Cyt-c-p                       | 566  |     |  | 143115_at   | 1.1 U   | 1.1 D   | 1.1 D   |  | 1.1 D |  | 1.9 U S | 1.2 D   |
| Marf                          | -920 | 428 |  | 153256_at   | 1.7 D S | 1.4 D S | 1.0 D   |  | 1.1 D |  | 1.4 D   | 1.1 D   |
| slgA                          | -160 |     |  | 142569_at   |         |         |         |  |       |  | 1.6 U   | 1.1 D   |
|                               |      |     |  | 151627_s_at |         |         |         |  |       |  | 2.2 U S | 1.0 U   |
| Cyp6a8                        |      |     |  | 141840_at   |         |         |         |  |       |  |         |         |
|                               |      |     |  | 142189_at   | 1.8 U S |         | 1.1 D   |  | 2.2 D |  |         |         |
| CG8430                        |      |     |  | 154150_at   | 1.1 D   | 1.1 U   | 1.1 U   |  | 1.1 D |  | 2.6 D S | 1.1 D   |
| l(2)tid                       |      |     |  | 141787_at   | 1.7 D S | 1.3 D   | 1.0 D   |  | 1.1 U |  | 1.6 U   | 1.1 D   |
| CG18324                       |      |     |  | 141476_at   | 1.7 D S | 1.0 U   | 1.2 U   |  | 1.1 U |  |         | 1.1 D   |
| CG7943                        | -368 |     |  | 141740_at   | 1.6 D S | 1.4 D   | 1.0 D   |  | 1.2 D |  | 1.1 D   | 1.1 D   |
| CG2118                        |      |     |  | 153355_at   | 1.4 D   | 1.8 D S | 1.1 D   |  | 1.0 D |  | 1.2 U   | 1.1 D   |
| CG5037                        |      |     |  | 154662_at   | 1.8 D S | 1.6 D S | 1.3 D   |  | 1.1 U |  | 1.2 U   | 1.2 D   |
| CG6459                        | 278  |     |  | 154495_at   | 1.2 D   | 1.4 D S | 1.8 D S |  | 1.3 D |  | 1.3 U   | 1.2 D   |
| Mgstl                         |      |     |  | 144097_at   | 1.0 U   | 1.0 U   | 1.1 U   |  | 1.5 D |  | 3.5 U S | 1.0 D   |
| CG5946                        |      |     |  | 152426_at   | 1.3 D   | 1.1 U   | 1.0 D   |  | 1.3 D |  | 2.8 U S | 1.0 U   |
| Nmdmc                         |      |     |  | 151767_at   | 1.2 D   | 1.8 D S | 1.6 D   |  | 1.1 U |  | 2.4 U S | 1.2 D   |



|                                                          |      |  |  |             |         |         |         |         |  |       |  |          |  |         |  |
|----------------------------------------------------------|------|--|--|-------------|---------|---------|---------|---------|--|-------|--|----------|--|---------|--|
|                                                          |      |  |  | 151656_at   | 1.7 D S | 1.3 U   |         | 1.8 U   |  | 1.3 U |  | 1.1 D    |  | 1.1 U   |  |
| Nmda1                                                    |      |  |  | 141915_at   | 1.3 D   |         | 1.1 D   | 1.2 U   |  | 1.0 D |  |          |  | 1.5 U   |  |
|                                                          |      |  |  | 142415_at   | 1.8 D S | 1.0 U   |         | 1.2 U   |  | 1.0 D |  | 3.4 D S  |  | 1.1 D   |  |
| <b>Immunity / stress response</b>                        |      |  |  |             |         |         |         |         |  |       |  |          |  |         |  |
| Dox-A3                                                   |      |  |  | 141775_at   | 1.5 U S | 1.1 U   |         | 1.0 D   |  | 1.2 D |  |          |  |         |  |
| PGRP-SD                                                  | 134  |  |  | 148352_at   | 1.0 D   |         | 1.0 U   | 1.9 U S |  | 1.7 U |  |          |  |         |  |
| PGRP-SA                                                  |      |  |  | 144882_at   | 1.2 U S | 1.3 U S |         | 1.7 U S |  | 1.3 U |  |          |  |         |  |
| TI                                                       |      |  |  | 151935_at   | 1.6 D S | 1.0 U   |         | 1.3 U   |  | 1.3 U |  | 1.0 D    |  | 1.1 U   |  |
| CG10535                                                  | -1   |  |  | 153291_at   | 1.5 D S | 1.5 D S |         | 1.3 D   |  | 1.1 D |  | 1.4 U    |  | 1.0 D   |  |
| Drs                                                      |      |  |  | 143605_at   | 1.0 D   |         | 1.1 U   | 2.8 U S |  | 1.2 U |  |          |  |         |  |
| PHGPx                                                    |      |  |  | 141815_at   | 1.6 U S | 1.3 U S |         | 1.1 U   |  | 1.3 D |  | 1.1 D    |  | 1.0 D   |  |
| Spn27A                                                   | -712 |  |  | 154259_at   | 1.0 U   |         | 1.3 U   | 1.9 U S |  | 1.2 U |  | 1.0 U    |  | 1.1 D   |  |
| CG10341                                                  | 17   |  |  | 152902_at   | 1.5 D S | 2.3 D S |         | 1.7 D S |  | 1.2 D |  | 2.9 U S  |  | 1.2 D   |  |
| <b>Extracellular matrix</b>                              |      |  |  |             |         |         |         |         |  |       |  |          |  |         |  |
| LanB1                                                    |      |  |  | 151856_at   | 1.2 D   |         | 1.1 U   | 1.8 U S |  | 1.1 U |  | 1.0 U    |  | 1.1 U   |  |
| Sgs8                                                     |      |  |  | 143350_at   |         |         |         |         |  |       |  | 23.5 U S |  | 1.1 D   |  |
| CG32354                                                  |      |  |  | 151303_at   |         |         |         |         |  |       |  |          |  |         |  |
|                                                          |      |  |  | 152249_at   | 1.2 D   |         | 1.5 U S | 2.6 U   |  |       |  |          |  |         |  |
| dp                                                       |      |  |  | 145764_at   |         |         |         |         |  |       |  |          |  | 1.9 U S |  |
| Lcp4                                                     |      |  |  | 143235_at   |         |         |         |         |  |       |  | 1.1 D    |  | 2.6 D S |  |
| Lcp1                                                     |      |  |  | 143232_at   |         |         |         |         |  |       |  | 1.3 D    |  | 1.9 D S |  |
| Lcp2                                                     |      |  |  | 143233_at   |         |         |         |         |  |       |  | 1.2 D    |  | 1.7 D S |  |
| CG8502                                                   | 185  |  |  | 141397_at   |         |         |         |         |  |       |  | 1.7 U S  |  | 1.1 U   |  |
| <b>Apoptosis</b>                                         |      |  |  |             |         |         |         |         |  |       |  |          |  |         |  |
| Ice                                                      |      |  |  | 152941_at   | 1.1 D   |         | 1.2 U   | 1.0 U   |  | 1.4 D |  | 1.9 D S  |  | 1.0 D   |  |
| CG7263                                                   |      |  |  | 154947_at   | 1.5 D   |         | 1.6 D S | 1.0 D   |  | 1.0 D |  | 1.1 U    |  | 1.4 D   |  |
| p53                                                      | 979  |  |  | 150416_at   | 1.1 U   |         | 1.1 U   | 1.2 U   |  | 1.1 U |  | 2.1 U S  |  | 1.1 U   |  |
| unk                                                      |      |  |  | 143458_at   | 1.3 D   |         | 1.3 D   | 1.1 D   |  |       |  | 2.2 D S  |  | 1.3 U   |  |
| CG14722                                                  | 298  |  |  | 154037_at   | 1.9 D S |         | 1.5 D S | 1.1 D   |  | 1.1 D |  | 1.8 U    |  | 1.3 D   |  |
| MESR4                                                    |      |  |  | 147376_at   | 1.2 D   |         | 1.5 D S | 1.3 D   |  | 1.5 D |  | 1.0 U    |  | 1.3 U   |  |
| CG32130                                                  |      |  |  | 148716_at   |         |         |         |         |  |       |  |          |  |         |  |
|                                                          |      |  |  | 151834_at   |         |         |         |         |  |       |  | 1.9 U S  |  | 1.6 U   |  |
| <b>Chromatin structure / general PolII transcription</b> |      |  |  |             |         |         |         |         |  |       |  |          |  |         |  |
| Taf4                                                     |      |  |  | 142999_at   | 1.6 D S | 1.2 D   |         | 1.1 U   |  | 1.4 D |  | 1.2 D    |  | 1.2 U   |  |
|                                                          |      |  |  | 151747_s_at | 1.2 D   |         | 1.3 D   | 1.0 U   |  | 1.6 D |  | 1.5 D    |  | 1.4 U   |  |
| RplI215                                                  |      |  |  | 155027_at   | 1.8 D S | 1.2 D   |         | 1.1 U   |  | 1.4 D |  | 1.3 D    |  | 1.2 U   |  |
| Rpb5                                                     | 536  |  |  | 146974_at   | 1.5 D S | 1.7 D S |         | 1.4 D   |  | 1.1 D |  | 1.5 U    |  | 1.2 D   |  |

|                |      |     |  |           |         |         |  |         |  |         |  |         |  |         |       |
|----------------|------|-----|--|-----------|---------|---------|--|---------|--|---------|--|---------|--|---------|-------|
| spt4           |      |     |  | 142904_at | 1.7 D S | 1.1 U   |  | 1.1 U   |  | 1.1 D   |  | 1.1 U   |  | 1.1 D   |       |
|                |      |     |  | 151714_at |         |         |  |         |  |         |  |         |  |         |       |
| Spt5           |      |     |  | 152632_at | 1.0 D   | 1.1 U   |  | 1.1 U   |  | 1.1 D   |  | 1.7 D S |  | 1.0 U   |       |
| E(bx)          |      |     |  | 147914_at | 1.4 D   | 1.4 D   |  | 1.3 U   |  |         |  | 1.6 D   |  | 1.1 U   |       |
|                |      |     |  | 147915_at | 1.1 U   | 1.3 D   |  | 1.0 U   |  |         |  | 2.2 D S |  | 1.1 U   |       |
|                |      |     |  | 147916_at |         | 2.6 D S |  |         |  |         |  | 2.3 D   |  | 1.2 U   |       |
| CG6751         | -641 | 29  |  | 154076_at | 1.7 D S | 2.2 D S |  | 2.0 D S |  | 1.0 D   |  | 2.1 U   |  | 1.3 D   |       |
| <b>Various</b> |      |     |  |           |         |         |  |         |  |         |  |         |  |         |       |
| wus            |      |     |  | 154066_at |         |         |  | 1.2 U   |  |         |  |         |  | 1.8 D S | 1.0 U |
| l(2)37Cc       |      |     |  | 152440_at | 1.2 D   | 1.6 D S |  | 1.3 D   |  | 1.3 D   |  | 1.1 U   |  | 1.1 D   |       |
| l(2)09851      | 35   | 830 |  | 146653_at | 1.7 D S | 2.3 D S |  | 1.7 D S |  | 1.3 D   |  | 2.5 U S |  | 1.3 D   |       |
| bgn            |      |     |  | 141854_at |         |         |  |         |  |         |  |         |  |         |       |
|                |      |     |  | 142234_at | 1.8 D S | 2.3 D S |  |         |  | 1.3 D   |  | 1.8 U   |  | 1.3 D   |       |
|                |      |     |  | 147811_at |         |         |  |         |  |         |  |         |  |         |       |
| lig            |      |     |  | 155119_at | 1.5 D S | 1.0 D   |  | 1.0 U   |  | 1.2 D   |  | 1.0 U   |  | 1.0 D   |       |
| dah            |      |     |  | 153153_at | 1.1 D   | 1.2 U   |  | 1.2 U   |  | 1.1 D   |  | 2.3 D S |  | 1.1 D   |       |
| CG1994         | -17  |     |  | 144714_at | 2.3 D S |         |  | 4.1 D S |  | 1.1 D   |  | 4.0 U S |  | 1.9 D S |       |
| CG3091         |      |     |  | 142199_at | 1.0 D   | 1.4 U   |  | 3.1 U S |  | 2.5 U S |  |         |  |         |       |
| CG32982        |      |     |  | 146070_at | 1.1 U   | 1.0 U   |  | 1.0 U   |  | 1.2 D   |  | 2.3 D S |  | 1.3 U   |       |
|                |      |     |  | 146071_at | 1.1 U   | 1.3 D   |  |         |  |         |  |         |  | 1.1 U   |       |
|                |      |     |  | 152498_at | 1.3 U   | 1.2 U   |  | 1.3 U   |  | 1.3 U   |  |         |  | 1.1 U   |       |
| Incnp          |      |     |  | 141608_at | 1.1 U   | 1.1 U   |  | 1.1 U   |  | 1.3 D   |  | 2.2 D S |  | 1.1 U   |       |
| sip2           |      |     |  | 145935_at | 1.2 U   | 1.1 U   |  | 1.1 U   |  | 1.5 D   |  | 1.8 D S |  | 1.2 U   |       |
| CG17836        | -944 |     |  | 141483_at | 1.2 U   | 1.2 U   |  | 1.2 U   |  | 1.1 U   |  | 1.6 D S |  | 1.0 U   |       |
| bnb            |      |     |  | 152418_at |         |         |  |         |  |         |  | 1.6 U   |  | 2.9 U S |       |
| CG32767        |      |     |  | 144505_at | 1.1 D   | 1.4 D   |  | 1.1 D   |  |         |  | 1.3 D   |  | 1.6 U S |       |
|                |      |     |  | 144506_at |         |         |  |         |  |         |  |         |  |         |       |
| CG31637        |      |     |  | 145906_at |         |         |  | 1.1 D   |  |         |  |         |  |         |       |
|                |      |     |  | 154703_at | 2.0 D S | 1.1 U   |  | 1.6 U   |  | 1.3 U   |  | 1.5 U   |  | 1.1 D   |       |
| CG11811        |      |     |  | 152077_at | 1.8 D S | 1.1 D   |  | 1.1 U   |  | 1.1 D   |  | 1.0 D   |  | 1.0 D   |       |
| CG8668         |      |     |  | 154502_at | 1.8 D S | 1.2 D   |  | 1.2 U   |  | 1.2 D   |  | 1.2 U   |  | 1.3 U   |       |
| slim           | -904 |     |  | 152991_at | 1.7 D S | 1.1 D   |  | 1.1 D   |  | 1.2 D   |  | 1.1 D   |  | 1.2 U   |       |
| Nup153         |      |     |  | 141207_at | 1.6 D S | 1.5 D   |  | 1.1 D   |  | 1.5 D   |  | 1.0 U   |  | 1.0 D   |       |
| CG11255        |      |     |  | 152613_at | 1.6 D S | 1.5 D S |  | 1.4 D   |  | 1.3 D   |  | 1.5 U   |  | 1.0 D   |       |
| CG31224        |      |     |  | 153102_at | 1.6 D S | 1.1 D   |  | 1.1 U   |  | 1.2 D   |  | 1.2 D   |  | 1.1 U   |       |
|                |      |     |  | 153568_at |         |         |  |         |  |         |  |         |  |         |       |
| yps            |      |     |  | 154807_at | 1.5 D S | 1.2 D   |  | 1.1 D   |  | 1.2 D   |  | 1.1 U   |  | 1.1 D   |       |
| Ngp            | 41   |     |  | 141785_at | 1.8 D S | 2.6 D S |  | 1.2 D   |  | 1.1 U   |  | 1.8 U   |  | 1.3 D   |       |

|             |      |      |     |             |         |         |         |  |       |  |         |  |         |  |
|-------------|------|------|-----|-------------|---------|---------|---------|--|-------|--|---------|--|---------|--|
| Nufip       |      |      |     | 153331_at   | 1.9 D S | 2.5 D S | 1.7 D   |  |       |  | 1.7 U   |  |         |  |
| CG13397     |      |      |     | 141346_at   | 1.3 D   | 2.4 D S | 1.5 D   |  | 1.4 U |  |         |  |         |  |
| CG10903     |      |      |     | 149471_at   | 1.0 D   | 1.8 D S | 1.8 D   |  | 1.1 D |  | 2.0 U   |  | 1.2 D   |  |
| larp        |      |      |     | 153228_at   | 1.6 D S | 1.7 D S | 1.0 D   |  | 1.2 D |  | 1.0 U   |  | 1.0 U   |  |
| Tsp3A       |      |      |     | 144411_at   | 1.3 D   | 1.7 D S | 1.2 U   |  |       |  |         |  | 1.0 U   |  |
| CG32626     |      |      |     | 151340_at   | 1.3 U   | 1.6 D S | 1.0 D   |  |       |  |         |  |         |  |
|             |      |      |     | 151341_at   |         |         |         |  |       |  |         |  |         |  |
|             |      |      |     | 152306_at   | 1.5 U S | 1.3 U S | 1.0 D   |  | 1.1 D |  | 1.3 D   |  | 1.2 U   |  |
| CG1662      | 163  |      |     | 152076_at   | 1.1 D   | 1.5 D S | 1.5 D   |  | 1.3 D |  | 1.4 U   |  |         |  |
| metI        | 385  |      |     | 154782_at   | 1.7 D S | 1.5 D S | 1.1 D   |  | 1.1 U |  | 1.2 U   |  | 1.1 D   |  |
| nudC        |      |      |     | 148915_at   | 1.5 D S | 1.5 D S | 1.2 D   |  | 1.0 U |  | 1.4 U   |  | 1.1 D   |  |
| CG4038      | 36   |      |     | 143696_at   | 1.8 D S | 2.6 D S | 2.3 D S |  | 1.4 D |  | 1.8 U   |  | 1.4 D   |  |
| spas        | -921 |      |     | 154205_at   | 1.1 D   | 1.0 D   | 1.1 D   |  |       |  | 4.2 U S |  | 1.2 U   |  |
| MgstI-&PSgr |      |      |     | 146619_i_at | 1.1 D   | 1.0 U   | 1.2 U   |  | 1.6 D |  | 3.2 U S |  | 1.2 U   |  |
|             |      |      |     | 146620_s_at | 1.2 U   | 1.1 U   | 1.0 U   |  | 1.3 D |  | 2.7 U S |  | 1.0 D   |  |
| Acyp2       | 970  |      |     | 149974_at   | 1.3 D   | 1.1 U   | 1.2 U   |  | 1.2 D |  | 2.9 U S |  | 1.1 U   |  |
| Gip         |      |      |     | 143691_at   | 1.1 D   | 1.3 D   | 1.1 D   |  | 1.1 D |  | 2.8 U S |  | 1.1 U   |  |
| ppan        | 16   |      |     | 143634_at   | 2.3 D S | 3.6 D S | 1.3 D   |  | 1.2 U |  | 2.8 U S |  | 1.3 D   |  |
| lama        |      |      |     | 153774_at   | 1.0 D   | 1.1 U   | 1.1 U   |  | 1.3 D |  | 2.6 U S |  | 1.2 D   |  |
| CG1965      | -57  |      |     | 151951_at   | 1.5 D   | 1.0 U   | 1.1 D   |  | 1.3 D |  | 2.5 U S |  | 1.1 U   |  |
| CG6697      |      |      |     | 154017_at   | 1.1 U   | 1.3 U   | 1.0 U   |  | 1.1 D |  | 2.3 U S |  | 1.1 U   |  |
| Mpp6        |      |      |     | 146574_at   |         | 1.4 D   | 1.4 D   |  | 1.2 D |  | 2.3 U S |  | 1.4 U   |  |
| pen         | 16   |      |     | 154002_at   | 1.9 D S | 2.7 D S | 1.5 D   |  | 1.0 D |  | 1.9 U S |  | 1.3 D   |  |
| Dgp-1       |      |      |     | 144194_at   | 1.2 D   | 1.3 D   | 1.2 U   |  | 2.3 D |  | 1.8 U S |  | 1.3 D   |  |
| Nrt         |      |      |     | 142670_at   |         |         |         |  |       |  |         |  | 1.4 U   |  |
|             |      |      |     | 151661_s_at | 1.0 D   | 1.1 U   | 1.2 D   |  | 1.9 U |  | 1.8 U S |  | 1.1 U   |  |
| Uhg1        | -14  | 336  | 498 | 151217_at   |         |         |         |  |       |  | 1.7 U S |  |         |  |
| melt        |      |      |     | 143969_at   |         |         |         |  |       |  | 2.2 D S |  | 1.4 U   |  |
| Cyp9f3&PSgr |      |      |     | 149768_s_at | 1.4 U S | 1.1 D   | 1.5 U S |  | 1.0 D |  | 1.0 U   |  | 1.2 U   |  |
| msb1I       |      |      |     | 154597_at   | 1.1 D   | 1.1 U   | 1.1 D   |  | 1.0 D |  | 2.1 D S |  | 1.1 U   |  |
| nord        | -735 |      |     | 147847_at   |         |         |         |  |       |  |         |  |         |  |
|             |      |      |     | 147849_at   |         |         |         |  |       |  | 1.7 D   |  | 1.9 U S |  |
| Mys45A      | 5    |      |     | 146866_at   | 2.2 D S |         |         |  | 1.1 U |  | 1.9 U   |  | 1.4 D   |  |
| Mkrn1       |      |      |     | 149186_at   | 2.0 D S | 1.1 D   | 1.1 D   |  | 1.3 D |  | 1.4 D   |  | 1.1 U   |  |
| Mlf         |      |      |     | 155053_at   | 1.9 D S | 1.4 D   | 1.1 U   |  | 1.2 D |  | 1.3 D   |  | 1.1 D   |  |
| MESK2       |      |      |     | 147624_at   |         |         |         |  |       |  |         |  |         |  |
|             |      |      |     | 151859_at   | 1.8 D S | 1.2 D   | 1.1 U   |  | 1.2 U |  | 1.3 U   |  | 1.2 D   |  |
| Jhl-1       | -480 | -369 |     | 146935_at   | 1.6 D S | 1.3 D   | 1.4 D   |  | 1.1 D |  | 1.2 U   |  | 1.4 D   |  |



|         |      |     |  |           |         |  |         |  |       |  |         |  |         |         |  |
|---------|------|-----|--|-----------|---------|--|---------|--|-------|--|---------|--|---------|---------|--|
| CG2818  | -982 |     |  | 154114_at | 1.1 D   |  | 1.1 D   |  | 1.2 D |  | 1.6 D   |  | 2.1 D S | 1.1 U   |  |
| CG8561  |      |     |  | 147192_at |         |  |         |  |       |  |         |  | 2.1 D S | 1.1 U   |  |
| CG10191 |      |     |  | 153557_at | 1.2 D   |  | 1.1 U   |  | 1.1 U |  | 1.5 D   |  | 2.1 D S | 1.2 U   |  |
| CG10722 |      |     |  | 153787_at | 1.2 D   |  | 1.1 D   |  |       |  |         |  | 2.1 D S | 1.2 U   |  |
| SP1173  | -332 |     |  | 152553_at |         |  |         |  |       |  |         |  | 2.0 D S | 1.1 U   |  |
| CG10176 |      |     |  | 146436_at |         |  |         |  |       |  |         |  | 1.7 D S | 1.3 U   |  |
| CG3624  |      |     |  | 152370_at | 1.3 U   |  | 1.1 U   |  | 1.4 U |  | 3.9 U S |  | 1.7 D S | 1.0 D   |  |
| CG12159 |      |     |  | 146775_at | 1.1 D   |  | 1.2 U   |  | 1.5 U |  | 1.2 U   |  | 1.1 U   | 2.0 U S |  |
| CG8483  |      |     |  | 154850_at |         |  |         |  |       |  |         |  | 1.2 D   | 1.6 U S |  |
| CG6896  |      |     |  | 142928_at |         |  | 1.3 D   |  |       |  |         |  |         |         |  |
|         |      |     |  | 151721_at | 2.7 D S |  | 1.1 D   |  | 2.0 U |  | 1.2 U   |  |         | 1.1 D   |  |
| CG6550  |      |     |  | 153079_at | 2.4 D S |  |         |  |       |  | 1.2 D   |  | 2.2 U   | 1.2 D   |  |
| CG15141 |      |     |  | 154299_at | 2.1 D S |  | 1.1 D   |  |       |  |         |  |         | 1.1 D   |  |
| CG10080 |      |     |  | 141651_at | 2.1 D S |  | 1.6 D   |  | 1.1 D |  | 1.2 U   |  | 1.8 U   | 1.2 D   |  |
| CG6421  |      |     |  | 144100_at |         |  |         |  |       |  |         |  |         |         |  |
|         |      |     |  | 155133_at | 2.1 D S |  | 1.8 D   |  | 1.5 D |  | 1.4 D   |  |         | 1.1 D   |  |
| CG5098  |      |     |  | 142629_at | 1.3 D   |  | 1.5 D   |  | 1.1 D |  |         |  | 1.1 D   | 1.4 U   |  |
|         |      |     |  | 151652_at | 2.0 D S |  | 1.5 D   |  | 1.2 U |  | 1.4 D   |  | 1.2 D   | 1.2 U   |  |
| CG18604 |      |     |  | 142636_at |         |  | 1.2 D   |  |       |  |         |  |         | 1.1 U   |  |
|         |      |     |  | 151657_at | 2.0 D S |  | 1.1 D   |  | 1.6 U |  | 1.1 D   |  | 1.1 D   | 1.2 U   |  |
| CG3226  |      |     |  | 153789_at | 1.9 D S |  | 1.0 U   |  | 1.2 U |  | 1.3 U   |  | 1.2 U   | 1.1 U   |  |
| CG17912 |      |     |  | 142747_at |         |  |         |  |       |  |         |  |         |         |  |
|         |      |     |  | 151671_at | 1.9 D S |  | 1.1 U   |  |       |  |         |  |         | 1.1 U   |  |
| CG10495 | -30  |     |  | 153552_at | 1.9 D S |  | 1.3 D   |  | 1.1 D |  | 1.0 U   |  | 1.4 U   | 1.0 U   |  |
| CG9386  | 177  |     |  | 149564_at | 1.9 D S |  | 1.3 D   |  | 1.1 U |  | 1.2 U   |  | 1.6 U   | 1.0 D   |  |
| CG9047  |      |     |  | 142263_at | 1.2 U   |  | 1.1 U   |  | 1.5 U |  | 1.2 D   |  | 1.1 D   | 1.1 U   |  |
|         |      |     |  | 151506_at | 1.9 D S |  | 1.0 D   |  | 1.4 U |  | 1.1 U   |  | 1.6 D   | 1.1 U   |  |
| CG32428 |      |     |  | 151117_at | 1.3 D   |  | 1.1 D   |  | 1.5 D |  |         |  | 1.1 D   | 1.2 U   |  |
|         |      |     |  | 155007_at | 1.9 D S |  | 1.4 D S |  | 1.3 D |  | 1.4 D   |  | 1.0 D   | 1.1 U   |  |
| CG13694 |      |     |  | 142106_at | 1.8 D S |  | 1.2 D   |  | 1.3 U |  | 1.4 U   |  |         |         |  |
|         |      |     |  | 143010_at |         |  |         |  |       |  |         |  |         |         |  |
| CG1575  | -830 | 518 |  | 155108_at | 1.8 D S |  |         |  |       |  | 1.2 U   |  |         |         |  |
| CG11417 | 9    | 674 |  | 154171_at | 1.8 D S |  |         |  | 1.5 D |  |         |  |         |         |  |
| CG4278  |      |     |  | 154440_at | 1.8 D S |  | 1.3 D   |  | 1.1 U |  | 1.1 D   |  | 1.7 U   | 1.2 D   |  |
| CG4281  | 69   |     |  | 152343_at | 1.8 D S |  | 1.2 D   |  | 1.1 U |  | 1.4 D   |  | 1.1 D   | 1.3 U   |  |
| CG18316 |      |     |  | 152995_at | 1.8 D S |  | 1.0 D   |  | 1.3 U |  | 1.3 U   |  | 3.2 D S | 1.6 U S |  |
| CG7800  |      |     |  | 152374_at | 1.8 D S |  | 1.1 D   |  | 1.2 U |  | 1.3 D   |  | 1.2 U   | 1.3 D   |  |
| CG7987  | -243 |     |  | 142970_at | 1.8 D S |  | 1.5 D   |  | 1.2 U |  | 1.2 D   |  | 1.8 U   | 1.1 U   |  |

|         |      |     |  |           |         |  |         |  |       |  |       |  |         |  |       |
|---------|------|-----|--|-----------|---------|--|---------|--|-------|--|-------|--|---------|--|-------|
| CG5319  |      |     |  | 142530_at | 1.0 D   |  | 1.1 D   |  | 1.1 U |  | 1.2 D |  | 1.0 U   |  | 1.0 U |
|         |      |     |  | 151609_at | 1.8 D S |  | 1.2 U   |  | 1.3 U |  | 1.4 D |  | 1.4 D   |  | 1.2 U |
| CG14210 | 1    |     |  | 145381_at | 1.8 D S |  |         |  |       |  |       |  |         |  |       |
| CG7670  |      |     |  | 153349_at | 1.7 D S |  | 1.0 U   |  | 1.0 U |  | 1.1 D |  | 1.8 D   |  | 1.1 U |
| CG1675  |      |     |  | 146907_at | 1.7 D S |  | 1.1 D   |  | 1.1 U |  | 1.1 D |  | 1.6 U   |  | 1.3 D |
| CG11033 | -827 |     |  | 142996_at |         |  |         |  |       |  |       |  | 1.0 D   |  | 1.2 D |
|         |      |     |  | 151745_at | 1.7 D S |  | 1.0 U   |  | 1.1 U |  | 1.4 D |  | 1.4 D   |  | 1.1 U |
| CG4957  |      |     |  | 141923_at |         |  |         |  |       |  |       |  |         |  |       |
|         |      |     |  | 142449_at | 1.7 D S |  | 1.5 D   |  | 1.2 U |  | 1.0 D |  | 1.8 U   |  | 1.6 U |
| CG11279 |      |     |  | 148695_at | 1.7 D S |  | 1.4 D   |  | 1.3 D |  | 1.0 U |  | 2.0 U   |  | 1.3 D |
| CG7668  |      |     |  | 153234_at | 1.7 D S |  | 1.0 U   |  | 1.2 U |  | 1.1 D |  | 1.1 D   |  | 1.1 U |
| CG7506  |      |     |  | 151858_at | 1.7 D S |  | 1.2 D   |  | 1.4 D |  | 1.1 U |  | 1.1 U   |  | 1.1 D |
| CG11444 | -352 |     |  | 153333_at | 1.7 D S |  | 1.3 D   |  | 1.2 D |  | 1.1 D |  | 1.6 U   |  | 1.2 D |
| CG3420  |      |     |  | 142004_at |         |  |         |  |       |  |       |  |         |  |       |
|         |      |     |  | 142715_at | 1.7 D S |  | 1.2 D   |  | 1.0 D |  | 1.2 D |  |         |  | 1.0 U |
| CG7516  | 25   | 936 |  | 154953_at | 1.7 D S |  | 1.6 D   |  |       |  |       |  | 1.7 U   |  | 1.3 D |
| CG14648 |      |     |  | 142781_at | 1.2 D   |  | 1.1 U   |  | 1.2 D |  | 1.3 D |  | 1.0 D   |  | 1.1 D |
|         |      |     |  | 151683_at | 1.6 D S |  | 1.1 D   |  | 1.1 D |  | 1.0 D |  | 1.1 D   |  | 1.0 U |
| CG6194  | 664  |     |  | 153901_at | 1.6 D S |  | 1.0 U   |  | 1.0 D |  | 1.1 D |  | 1.3 U   |  | 1.2 D |
| CG9795  |      |     |  | 154414_at | 1.6 D S |  | 1.4 D   |  | 1.2 D |  | 1.1 D |  | 1.1 U   |  | 1.4 U |
| CG15881 |      |     |  | 153375_at | 1.6 D S |  | 1.2 D   |  | 1.1 U |  | 1.2 U |  | 1.1 U   |  | 1.0 D |
| CG15433 | 48   |     |  | 145760_at | 1.6 D S |  | 1.5 D S |  | 1.1 D |  | 1.0 U |  | 1.5 U   |  | 1.2 D |
| CG1416  |      |     |  | 155036_at | 1.6 D S |  | 1.2 D   |  | 1.1 U |  | 1.4 U |  | 1.1 U   |  | 1.2 D |
| CG8229  |      |     |  | 154406_at | 1.5 D S |  | 1.3 D   |  | 1.0 D |  | 1.0 U |  | 1.1 U   |  | 1.2 D |
| CG31342 |      |     |  | 149810_at | 1.2 U   |  | 1.4 D   |  | 1.1 D |  |       |  | 1.3 D   |  | 1.0 U |
|         |      |     |  | 154631_at | 1.5 D S |  | 1.1 D   |  | 1.4 U |  | 1.0 D |  | 1.1 D   |  | 1.0 U |
| CG1371  |      |     |  | 141706_at | 1.5 D S |  | 1.4 D S |  | 1.0 D |  | 1.2 D |  | 1.3 D   |  | 1.1 D |
| CG9324  |      |     |  | 153490_at | 1.5 D S |  | 1.1 U   |  | 1.1 U |  | 1.2 D |  | 2.1 D S |  | 1.2 D |
| CG7950  | 229  | 237 |  | 153139_at | 1.5 D S |  | 1.4 D S |  | 1.5 D |  | 1.0 D |  | 1.2 U   |  | 1.0 U |
| CG17295 |      |     |  | 146028_at | 1.5 D S |  | 1.1 U   |  | 1.1 U |  | 1.2 U |  | 1.5 U   |  | 1.1 U |
| CG6181  |      |     |  | 154620_at | 1.5 D S |  | 1.1 D   |  | 1.2 U |  | 1.3 D |  | 1.2 D   |  | 1.1 D |
| CG32708 |      |     |  | 143025_at | 1.5 D S |  | 1.3 D   |  | 1.3 D |  | 1.1 D |  | 1.3 U   |  | 1.1 D |
| CG17385 |      |     |  | 147201_at | 1.5 D S |  | 1.0 D   |  | 1.0 D |  | 1.3 D |  | 1.3 U   |  | 1.1 D |
| CG9318  |      |     |  | 155059_at | 1.5 D S |  | 1.0 U   |  | 1.2 U |  | 1.1 D |  | 1.1 U   |  | 1.2 U |
| CG6833  | 546  | 892 |  | 152845_at | 1.5 D S |  | 1.0 D   |  | 1.1 D |  | 1.4 D |  | 1.0 U   |  | 1.1 D |
| CG14224 | 362  |     |  | 142855_at |         |  |         |  |       |  |       |  | 1.1 D   |  |       |
|         |      |     |  | 151703_at | 1.5 D S |  | 1.1 D   |  | 1.0 U |  | 1.3 D |  | 1.2 U   |  | 1.1 U |
| CG7728  | 26   |     |  | 154829_at | 2.2 D S |  | 2.7 D S |  | 1.3 D |  | 1.0 D |  | 1.1 U   |  | 1.3 D |



|         |      |     |  |             |         |         |       |  |       |       |         |  |
|---------|------|-----|--|-------------|---------|---------|-------|--|-------|-------|---------|--|
| CG11180 | -98  |     |  | 153192_at   | 2.5 D S | 2.5 D S | 2.0 D |  | 1.2 D | 1.9 U | 1.2 U   |  |
| CG5645  | 26   |     |  | 153460_at   |         | 2.3 D S |       |  |       |       | 1.5 D   |  |
| CG2972  | 17   |     |  | 153909_at   | 1.6 D S | 2.3 D S | 1.6 D |  | 1.1 D | 1.6 U | 1.2 D   |  |
| CG8368  |      |     |  | 148285_at   | 3.1 D S | 2.3 D S | 1.7 D |  | 1.2 D | 1.9 U | 1.5 D   |  |
| CG10286 | 40   |     |  | 152411_at   | 2.3 D S | 2.1 D S | 1.4 D |  | 1.0 D | 1.6 U | 1.3 D   |  |
| CG14788 | 34   |     |  | 141845_at   |         |         |       |  |       |       |         |  |
|         |      |     |  | 142203_at   | 1.7 D S | 2.1 D S | 1.7 D |  | 1.2 D | 1.7 U | 1.5 D S |  |
| CG9107  |      |     |  | 154505_at   | 1.5 D S | 2.0 D S | 1.6 D |  | 1.0 U | 2.0 U | 1.2 D   |  |
| CG3735  | 30   |     |  | 154746_at   | 2.0 D S | 2.0 D S | 1.1 D |  | 1.2 D | 1.9 U | 1.0 D   |  |
| CG32763 | 13   | 137 |  | 154033_at   |         | 2.0 D S | 1.8 D |  | 1.2 D | 1.9 U | 1.3 D   |  |
| CG2614  |      |     |  | 153768_at   | 1.8 D S | 1.9 D S | 1.1 D |  | 1.1 U | 1.6 U | 1.0 U   |  |
| CG8327  | 11   |     |  | 152178_at   | 1.1 D   | 1.9 D S | 1.5 D |  | 1.3 D | 1.9 U | 1.5 D   |  |
| CG10189 | 378  |     |  | 152470_at   | 1.4 D   | 1.9 D S | 1.3 D |  | 1.0 D | 1.4 U | 1.1 D   |  |
| CG4069  | 30   |     |  | 141287_at   | 2.0 D S | 1.9 D S | 1.3 D |  | 1.0 D |       | 1.2 D   |  |
| CG12134 | 217  |     |  | 146915_at   | 1.9 D S | 1.9 D S | 1.4 D |  | 1.4 D | 1.6 U | 1.2 D   |  |
| CG15867 | -343 |     |  | 151423_at   | 1.1 U   | 1.8 D S |       |  |       |       | 1.2 U   |  |
| CG33129 |      |     |  | 146211_at   | 1.0 U   | 1.1 D   | 1.0 D |  | 1.3 D | 1.1 D | 1.0 U   |  |
|         |      |     |  | 146212_at   | 1.1 D   | 1.8 D S | 1.2 D |  | 1.2 D | 1.2 U | 1.0 D   |  |
| CG3224  | 212  |     |  | 144605_at   | 1.3 D   | 1.8 D S | 1.4 D |  | 1.1 U |       | 1.0 U   |  |
| CG3709  |      |     |  | 145515_at   | 1.7 D   | 1.8 D S | 1.4 D |  | 1.6 D | 2.0 U | 1.6 D   |  |
| CG8675  | 230  | 316 |  | 153631_at   | 1.5 D   | 1.8 D S | 1.0 D |  | 1.0 U | 1.9 U | 1.2 D   |  |
| CG9123  |      |     |  | 142027_at   |         |         |       |  |       |       |         |  |
|         |      |     |  | 142782_s_at | 1.7 D S | 1.8 D S | 1.5 D |  | 1.0 U | 1.3 U | 1.0 D   |  |
| CG30497 |      |     |  | 146765_at   | 1.1 U   | 1.2 D   | 1.1 U |  | 1.6 D |       |         |  |
|         |      |     |  | 146766_at   | 1.0 D   | 1.8 D S | 1.0 U |  |       |       |         |  |
| CG9890  |      |     |  | 147737_at   | 1.3 D   | 1.7 D S |       |  | 1.0 D | 1.6 U | 1.2 U   |  |
| CG2875  | 816  |     |  | 154029_at   | 1.9 D S | 1.7 D S | 1.4 D |  | 1.3 D | 1.6 U | 1.1 D   |  |
| CG11123 | -849 |     |  | 146739_at   | 1.9 D S | 1.7 D S | 1.1 D |  | 1.2 D | 2.0 U | 1.2 D   |  |
| CG2260  | 7    | 364 |  | 154955_at   | 1.5 D   | 1.7 D S |       |  | 1.0 D | 1.5 U | 1.1 D   |  |
| CG14543 | 769  |     |  | 150641_at   | 1.4 D   | 1.7 D S | 1.4 D |  | 1.1 U | 1.5 U | 1.4 D   |  |
| CG4975  | 745  |     |  | 147394_at   | 1.3 D   | 1.7 D S | 1.3 D |  | 1.2 D | 1.6 U | 1.2 D   |  |
| CG1074  |      |     |  | 141546_at   | 1.6 D S | 1.7 D S | 1.3 D |  | 1.1 D | 1.8 U | 1.2 D   |  |
| CG12592 |      |     |  | 143043_s_at | 1.1 D   | 1.7 D S | 1.1 D |  | 1.5 D | 1.0 D | 1.2 D   |  |
|         |      |     |  | 151759_s_at | 1.5 D S | 1.4 D S | 1.0 D |  | 1.4 D | 1.1 U | 1.1 U   |  |
| CG15771 |      |     |  | 142223_at   | 1.1 D   | 1.3 D   | 1.1 U |  | 1.1 D | 1.2 U | 1.1 D   |  |
|         |      |     |  | 151499_at   | 1.4 D   | 1.7 D S | 1.2 U |  | 1.2 U | 1.6 U | 1.2 U   |  |
| CG8002  |      |     |  | 145362_at   | 1.2 U   | 1.7 D S | 1.1 U |  |       | 1.1 D | 1.4 U   |  |
| CG9922  |      |     |  | 149869_at   | 1.4 D   | 1.6 D S | 1.3 D |  | 1.3 U | 1.4 U | 1.2 D   |  |

|           |      |      |    |           |         |         |         |       |         |         |
|-----------|------|------|----|-----------|---------|---------|---------|-------|---------|---------|
| l(3)s1921 |      |      |    | 142561_at | 1.4 D   | 1.6 D S | 1.3 D   | 1.2 D | 1.6 U   | 1.1 U   |
| CG5290    | 186  | 195  |    | 141652_at | 1.7 D S | 1.6 D S | 1.4 D   | 1.3 U | 1.2 U   | 1.1 D   |
| CG12797   |      |      |    | 154566_at | 1.1 D   | 1.5 D S | 1.0 U   | 1.1 D | 1.5 U   | 1.0 U   |
| CG4364    | -421 |      |    | 154393_at | 1.8 D S | 2.3 D S | 2.2 D S | 1.5 U | 1.1 U   | 1.3 D   |
| CG10805   | -13  |      |    | 141566_at | 2.1 D S | 2.7 D S | 2.0 D S | 1.2 U | 1.6 U   | 1.5 D   |
| CG2982    | 39   |      |    | 154908_at |         | 1.9 D S | 1.9 D S |       | 1.8 U   | 1.1 D   |
| CG14434   |      |      |    | 144625_at | 1.2 D   | 1.4 D S | 1.8 D S | 1.1 D | 1.1 D   | 1.1 D   |
| CG3251    | -568 | -172 |    | 145773_at | 1.0 D   | 1.5 D S | 1.7 D S | 1.3 D |         |         |
| CG7519    |      |      |    | 149182_at | 1.3 D   | 1.6 D S | 1.6 D S | 1.6 D | 1.5 U   | 1.1 D   |
| CG5047    |      |      |    | 142738_at | 1.3 D   | 1.4 D   | 1.1 D   | 1.3 D | 5.3 U S | 1.3 D   |
| CG11563   | 22   |      |    | 150954_at | 1.8 D S | 3.4 D S | 1.5 D   | 1.0 U | 3.7 U S | 1.3 D   |
| CG3259    |      |      |    | 149889_at |         |         |         |       | 3.2 U S | 1.3 U   |
| CG9799    | 6    | 440  |    | 141659_at | 1.8 D S | 2.1 D S | 1.8 D S | 1.0 U | 3.1 U S | 1.4 D   |
| CG11604   | 416  |      |    | 153448_at | 2.4 D S | 3.7 D S | 2.7 D S | 1.2 D | 3.1 U S | 1.4 D   |
| CG9246    | 34   |      |    | 155156_at | 2.2 D S | 2.1 D S | 1.3 D   | 1.5 U | 3.0 U S | 1.1 D   |
| CG18178   | 109  |      |    | 151938_at | 2.2 D S | 2.8 D S | 1.6 D   | 1.0 D | 3.0 U S | 1.2 D   |
| CG7338    |      |      |    | 154433_at | 2.0 D S | 2.8 D S | 1.6 D   | 1.1 D | 2.9 U S | 1.6 D S |
| l(3)07882 | 45   | 237  |    | 153862_at | 1.9 D S | 1.6 D   | 1.7 D   | 1.1 U | 2.9 U S | 1.1 D   |
| CG15027   | -38  |      |    | 145101_at | 2.1 D S | 2.5 D S |         | 1.1 U | 2.8 U S | 1.1 D   |
| CG11880   |      |      |    | 141361_at | 1.3 D   | 1.3 U   | 1.1 D   | 1.4 D | 2.8 U S | 1.2 U   |
| CG12325   | 40   |      |    | 153712_at | 2.5 D S |         | 2.3 D S | 1.2 D | 2.7 U S | 1.1 D   |
| CG7137    | 41   |      |    | 153734_at | 1.8 D S | 1.8 D   | 1.4 D   | 1.1 D | 2.6 U S | 1.1 D   |
| CG12785   | 19   |      |    | 155019_at | 2.4 D S | 2.5 D S | 1.8 D   | 1.1 D | 2.6 U S | 1.4 D   |
| CG7637    | -726 | -43  |    | 146963_at | 2.0 D S | 2.3 D S | 1.6 D   | 1.0 U | 2.6 U S | 1.6 D   |
| CG7006    | -500 | -380 | 28 | 142493_at | 1.7 D S | 2.1 D S | 1.5 D   | 1.2 D | 2.5 U S | 1.3 D   |
| CG5558    | 23   | 29   |    | 153877_at | 2.1 D S | 1.8 D   | 1.1 U   | 1.4 U | 2.5 U S | 1.2 D   |
| CG7993    | 36   |      |    | 151780_at | 1.2 D   | 1.6 D S |         | 1.2 U | 2.5 U S |         |
| CG6724    | 217  |      |    | 146191_at | 1.8 D S | 1.7 D S | 1.7 D   | 1.0 U | 2.4 U S | 1.2 D   |
| CG7845    | -697 | 24   |    | 141258_at | 2.9 D S | 3.5 D S | 2.0 D S | 1.4 D | 2.4 U S | 1.6 D   |
| CG1381    | 29   |      |    | 141230_at | 1.6 D S | 2.3 D S | 2.1 D S | 1.1 U | 2.4 U S | 1.5 D   |
| CG12093   |      |      |    | 142691_at | 1.1 D   | 1.1 U   | 1.0 U   | 1.4 D | 2.4 U S | 1.1 D   |
| CG4554    | -6   |      |    | 153124_at | 2.0 D S | 3.1 D S |         | 1.0 U | 2.4 U S | 1.3 D   |
| CG18135   |      |      |    | 155139_at |         | 1.1 D   | 1.3 U   |       | 2.3 U S | 1.5 U   |
| CG13773   |      |      |    | 152912_at | 1.7 D S | 2.1 D S | 1.7 D   | 1.0 U | 2.3 U S | 1.2 D   |
| CG3817    |      |      |    | 153284_at | 1.5 D   | 1.1 D   | 1.2 D   | 1.0 U | 2.3 U S | 1.3 D   |
| CG30118   | 424  |      |    | 147439_at | 1.2 D   | 1.4 D   |         |       | 1.3 U   | 1.1 D   |
|           |      |      |    | 152372_at | 1.2 D   | 1.4 D   |         |       | 2.3 U S | 1.0 D   |
| CG30349   | 90   | 236  |    | 146843_at | 1.6 D S | 2.5 D S | 2.0 D S | 1.2 D | 1.9 U S | 1.5 D   |

|         |      |     |  |             |         |         |         |       |  |         |       |  |
|---------|------|-----|--|-------------|---------|---------|---------|-------|--|---------|-------|--|
|         |      |     |  | 146844_at   | 1.8 D S | 2.7 D S | 2.1 D S | 1.0 D |  | 2.3 U S | 1.6 D |  |
| CG12975 |      |     |  | 149168_at   | 1.7 D S | 2.0 D S | 1.4 D   | 1.2 D |  | 2.3 U S | 1.2 D |  |
| CG14701 |      |     |  | 149679_at   | 1.4 D   | 1.4 D S | 1.5 D   | 1.5 D |  | 2.3 U S | 1.3 D |  |
| CG10648 | 10   |     |  | 144716_at   | 1.3 D   | 4.0 D S | 2.4 D S | 1.5 D |  | 2.3 U S | 1.7 D |  |
| CG15014 | 153  |     |  | 148169_at   | 1.5 D   | 1.3 D   | 1.3 D   | 1.7 D |  | 2.3 U S | 1.1 D |  |
| CG14286 |      |     |  | 150175_at   | 1.4 D   | 1.4 D   | 1.0 D   | 1.2 D |  | 2.3 U S | 1.1 D |  |
| CG10220 | 25   |     |  | 142621_at   | 1.1 D   | 1.2 D   | 1.1 U   | 1.2 D |  | 1.3 D   | 1.1 U |  |
|         |      |     |  | 151647_at   | 2.4 D S | 2.8 D S | 1.4 D   | 1.1 D |  | 2.2 U S | 1.9 D |  |
| CG5114  | 14   |     |  | 153148_at   | 1.2 D   | 2.3 D S | 1.9 D S | 1.2 D |  | 2.2 U S | 1.2 D |  |
| CG9422  | -637 | 15  |  | 146687_at   | 1.1 D   | 1.2 D   | 1.1 U   | 1.0 D |  | 2.2 U S | 1.1 D |  |
| CG1234  |      |     |  | 154719_at   | 2.0 D S | 3.0 D S | 2.2 D S | 1.1 D |  | 2.2 U S | 1.2 D |  |
| CG12128 | 33   |     |  | 153156_at   | 2.4 D S | 2.5 D S | 1.3 D   | 1.0 D |  | 2.2 U S | 1.4 D |  |
| CG7841  | -221 |     |  | 148805_at   |         |         |         |       |  | 2.1 U S |       |  |
| CG6509  |      |     |  | 146243_at   | 1.4 D   | 1.1 D   | 1.0 D   | 1.3 D |  | 2.1 U S | 1.2 U |  |
| CG9986  |      |     |  | 154402_at   | 1.3 U   | 1.1 U   | 1.0 D   | 1.3 D |  | 2.0 U S | 1.0 D |  |
| CG3983  | 135  | 727 |  | 150045_at   | 3.3 D S | 2.3 D S | 1.6 D   | 1.2 U |  | 2.0 U S | 1.4 D |  |
| CG14550 | 810  |     |  | 150642_at   | 1.2 D   | 1.1 D   | 1.0 D   | 1.0 D |  | 2.0 U S | 1.3 D |  |
| CG8816  | 63   |     |  | 147104_at   | 1.8 D S | 2.8 D S | 1.5 D   | 1.0 D |  | 2.0 U S | 1.2 D |  |
| CG7989  | 30   |     |  | 153875_at   | 1.7 D S | 2.5 D S | 1.5 D   | 1.6 D |  | 2.0 U S | 1.1 D |  |
| CG11076 | 806  |     |  | 150993_at   | 2.3 D S | 2.0 D S | 1.6 D   | 1.4 D |  | 2.0 U S | 1.3 D |  |
| CG1785  | -454 | 19  |  | 152691_at   | 1.9 D S | 2.4 D S | 2.1 D S | 1.2 D |  | 1.9 U S | 1.2 D |  |
| CG8064  | 25   |     |  | 151766_at   |         | 2.2 D S |         | 1.4 D |  | 1.9 U S | 1.3 D |  |
| CG12301 | -12  |     |  | 154570_at   | 1.3 D   |         |         | 1.1 D |  | 1.9 U S | 1.2 D |  |
| CG3353  | -946 | 34  |  | 150304_at   | 1.6 D S | 2.2 D S | 1.5 D   | 1.2 D |  | 1.9 U S | 1.2 D |  |
| CG18166 |      |     |  | 144345_s_at | 1.6 D S | 2.4 D S | 1.3 D   | 1.5 D |  | 1.8 U S | 1.1 D |  |
